## RESEARCH ARTICLE

# Impact of COVID-19 on access to and delivery of sexual and reproductive healthcare services in countries with universal healthcare systems: A systematic review

Michelle W. Tam<sup>1\*</sup>, Victoria H. Davis<sup>2,3</sup>, Monish Ahluwalia<sup>3,4</sup>, Rachel S. Lee<sup>1</sup>, Lori E. Ross<sup>1</sup>

**1** University of Toronto Dalla Lana School of Public Health, Toronto, ON, Canada, **2** Upstream Lab, MAP Centre for Urban Health Solutions, Li Ka Shing Knowledge Institute, St. Michael's Hospital, Toronto, ON, Canada, **3** Institute of Health Policy, Management and Evaluation, University of Toronto, Toronto, ON, Canada, **4** University of Toronto Faculty of Medicine, 1 King's College Circle, Toronto, ON, Canada

\* [Michellewuy.tam@utoronto.ca](mailto:Michellewuy.tam@utoronto.ca)

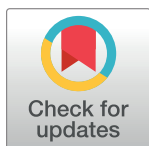

## OPEN ACCESS

**Citation:** Tam MW, Davis VH, Ahluwalia M, Lee RS, Ross LE (2024) Impact of COVID-19 on access to and delivery of sexual and reproductive healthcare services in countries with universal healthcare systems: A systematic review. *PLoS ONE* 19(2): e0294744. <https://doi.org/10.1371/journal.pone.0294744>

**Editor:** José Antonio Ortega, University of Salamanca, SPAIN

**Received:** March 24, 2023

**Accepted:** November 1, 2023

**Published:** February 23, 2024

**Copyright:** © 2024 Tam et al. This is an open access article distributed under the terms of the [Creative Commons Attribution License](https://creativecommons.org/licenses/by/4.0/), which permits unrestricted use, distribution, and reproduction in any medium, provided the original author and source are credited.

**Data Availability Statement:** All relevant data are within the manuscript and its [Supporting Information](#) files.

**Funding:** The authors received no specific funding for this work.

**Competing interests:** The authors have declared that no competing interests exist.

## Abstract

### Objectives

The COVID-19 pandemic has caused unforeseen impacts on sexual and reproductive healthcare (SRH) services worldwide, and the nature and prevalence of these changes have not been extensively synthesized. We sought to synthesise reported outcomes on the impact of COVID-19 on SRH access and delivery in comparable countries with universal healthcare systems.

### Methods

Following PRISMA guidelines, we searched MEDLINE, Embase, PsycInfo, and CINAHL from January 1st, 2020 to June 6th, 2023. Original research was eligible for inclusion if the study reported on COVID-19 and SRH access and/or delivery. Twenty-eight OECD countries with comparable economies and universal healthcare systems were included. We extracted study characteristics, participant characteristics, study design, and outcome variables. The methodological quality of each article was assessed using the Quality Assessment with Diverse Studies (QuADS) tool. The Preferred Reporting Items for Systematic Reviews and Meta-analyses (PRISMA) guidelines were followed for reporting the results. This study was registered on PROSPERO (#CRD42021245596).

### Synthesis

Eighty-two studies met inclusion criteria. Findings were qualitatively synthesised into the domains of: antepartum care, intrapartum care, postpartum care, assisted reproductive technologies, abortion access, gynaecological care, sexual health services, and HIV care. Research was concentrated in relatively few countries. Access and delivery were negatively impacted by a variety of factors, including service disruptions, unclear communication

regarding policy decisions, decreased timeliness of care, and fear of COVID-19 exposure. Across outpatient services, providers favoured models of care that avoided in-person appointments. Hospitals prioritized models of care that reduced time and number of people in hospital and aerosol-generating environments.

## Conclusions

Overall, studies demonstrated reduced access and delivery across most domains of SRH services during COVID-19. Variations in service restrictions and accommodations were heterogeneous within countries and between institutions. Future work should examine long-term impacts of COVID-19, underserved populations, and underrepresented countries.

## Introduction

Globally, the COVID-19 pandemic has exacerbated pre-existing inequities in accessing a range of healthcare services due to social distancing, lockdown measures, self-isolation, and clinic closures [1, 2]. Access to sexual and reproductive health (SRH) services including pregnancy care, safe abortion, contraception, treatment of sexually transmitted infections (STIs) and gynaecological malignancies, is critical to overall health and quality of life [3, 4]. During the COVID-19 pandemic, public health officials worldwide prioritised pandemic-related services over routine/elective healthcare services [5]. Lockdown conditions varied from Australia phasing out lockdowns in October 2021 and declaring emergency responses finished in September 2022 [6] to the United Kingdom implementing a final lockdown in January 2021 and all restrictions were lifted in February 2022 [7]. Thus, a wide variety of health delivery and health policy adaptations were implemented across jurisdictions for continued provision of SRH given pandemic restrictions. However, there is a paucity of current synthesised evidence on the impact of COVID-19 on access and delivery of SRH services. Understanding these changes allows us to examine the impact of COVID-19 on different aspects of SRH, which can guide current and future policy and institutional responses within and beyond the pandemic's context. This systematic review aims to examine the impact of COVID-19 on access to and delivery of SRH services in countries with universal healthcare.

## Methods

This systematic review was prospectively registered with the International Prospective Register of Systematic Reviews (PROSPERO) database (Registration number CRD42021245596) and followed the Preferred Reporting Items for Systematic Reviews and Meta-Analyses (PRISMA) guidelines [8].

## Information sources and search strategy

Four databases were searched: MEDLINE, Embase, PsycINFO, and CINAHL. A literature search strategy was formulated with the assistance of an Information Specialist at the University of Toronto. Search terms relating to sexual health, reproductive health, contraception, fertility, pregnancy, and abortion were combined with COVID-19 (e.g., coronavirus) and health services access and delivery to identify relevant studies (see [S1 Fig](#)).

**Study selection.** Peer-reviewed French- and English-language original research publications from January 1, 2020 to June 6<sup>th</sup>, 2023 reporting on COVID-19 and SRH access and/or

delivery in high-income Organisation for Economic Co-operation and Development (OECD) countries with comparable economies and universal healthcare (UHC) systems were included (see [S1 Table](#)) [9]. Countries included in this review are high-income countries as classified by the World Bank and must have universal [or near-universal] coverage for core medical services [9]. Implementation guidelines, reviews, commentaries, conference abstracts, meta-analyses, and editorial texts were excluded. Further, to focus on the impact of COVID-19 on SRH services, articles were excluded if they only described access or care delivery without either quantitative or qualitative comparison to a time period prior to the pandemic or prior experience.

Covidence systematic review software (Veritas Health Innovation, Melbourne, Australia) was used to manage and identify duplicates from the search results. Two independent reviewers (MWT, VHD, MA, and/or RL) screened titles and abstracts and then reviewed the full text to determine eligibility. Disagreements were resolved through consensus.

### Data extraction and synthesis of results

Two independent reviewers (MWT, VHD, and/or MA) extracted information on: authors, date of publication, country, study design, data collection dates, objectives, sample size, participant characteristics, inclusion and exclusion criteria, relevant outcome variables, and main findings.

Outcomes were categorised into eight sections: antepartum care, intrapartum care, postpartum care, assisted reproductive technology (ART) access, abortion access, gynaecological care, sexual health services, and human immunodeficiency virus (HIV) care.

### Quality appraisal assessment

A critical quality appraisal was conducted using the validated Quality Appraisal for Diverse Studies (QuADS) tool [10]. This tool was chosen due to the diversity of research design methodologies among the included studies. Two reviewers (VHD, MA) independently scored each article between 0–3 across thirteen questions, and a third reviewer (MWT) resolved discrepancies which were discussed and agreed upon during a meeting. The appraisal ([S2 Table](#)) informed our discussions about the research.

### Results

The search strategy ([S1 Fig](#)) yielded 3852 original database citations, of which 843 duplicates were removed. A total of 3009 titles and abstracts were screened. Of these, 241 underwent full-text screening, and 82 were included in the systematic review. Of the 28 UHC countries eligible for inclusion, 27 were represented in this review, as there were no studies from the Republic of Korea. The distribution of studies across countries is described in [Table 1](#).

[Table 2](#) provides a summary of the main results of the studies and the QuADS results. On average, studies had a quality score of 66.6% (25.97/39) across the 13 questions. The quality appraisal assessment found that studies typically scored high (2–3) on the research aims statement, description of research setting and target population, the appropriateness of their study design, and conceptual underpinnings to the research. On average, studies had the lowest scores on their involvement of research stakeholders in the research process, followed by their justification of the analytic method and discussion of strengths and limitations.

### Antepartum care

Thirty-three studies reported the impact of COVID-19 on antepartum care. With regards to antepartum care access, a hospital in Italy noted that 20% of patients were unable to carry out all antepartum appointments due to service suspension, unavailability, or personal choice [11].

**Table 1. Characteristics of studies included in this review (N = 82).**

| Study Location              | #of Studies | Citation                                                                                                                                                                                                                                                                                                                                                                                                                                                                                                            |
|-----------------------------|-------------|---------------------------------------------------------------------------------------------------------------------------------------------------------------------------------------------------------------------------------------------------------------------------------------------------------------------------------------------------------------------------------------------------------------------------------------------------------------------------------------------------------------------|
| Australia                   | 16          | [Chow et al., 2021] [73],<br>[Homer et al., 2021] [41],<br>[Traeger et al., 2021] [88],<br>[Weerasuria et al., 2021] [85],<br>[Trinh et al., 2022] [25],<br>[Bradfield et al., 2022] [26],<br>[Potenza et al., 2021] [27],<br>[Sweet et al., 2021] [28],<br>[Kluwgant et al., 2022] [38],<br>[Wilson et al., 2022] [36],<br>[Phillips et al., 2021] [74],<br>[Coombe et al., 2021] [77],<br>[Bittleston et al., 2022] [70],<br>[Lee et al., 2021] [84],<br>[Newman et al., 2022] [62],<br>[Henry et al., 2022] [95] |
| Belgium                     | 2           | [De Kort et al., 2021] [56],<br>[El Moussaoui et al., 2021] [87]                                                                                                                                                                                                                                                                                                                                                                                                                                                    |
| Canada                      | 13          | [Cameron et al., 2021] [53],<br>[Hukku et al., 2022] [58],<br>[Ennis et al., 2021] [57],<br>[Lam et al., 2022] [65],<br>[Wood et al., 2022] [81],<br>[Gomez et al., 2021] [68]<br>[Clark et al., 2023] [39],<br>[Ryu et al., 2023] [75],<br>[Boisvert et al., 2022] [43],<br>[Souleymanov et al., 2023] [82],<br>[Bayrampour & Tsui, 2023] [54],<br>[Baaske et al., 2022] [71],<br>[Khoury et al., 2022] [19]                                                                                                       |
| Denmark                     | 1           | [Overbeck et al., 2020] [21]                                                                                                                                                                                                                                                                                                                                                                                                                                                                                        |
| France                      | 3           | [Doncarli et al., 2021] [23],<br>[Atay et al., 2021] [60],<br>[Mallaury et al., 2022] [59]                                                                                                                                                                                                                                                                                                                                                                                                                          |
| Germany                     | 2           | [Rød et al., 2023] [63],<br>[Hertle et al., 2022] [34]                                                                                                                                                                                                                                                                                                                                                                                                                                                              |
| Ireland                     | 2           | [Greene et al., 2022] [61],<br>[Schaler et al., 2022] [66]                                                                                                                                                                                                                                                                                                                                                                                                                                                          |
| Israel                      | 4           | [Justman et al., 2020] [24],<br>[Binyamin et al., 2021] [50],<br>[Karavani et al., 2021] [67],<br>[Herzberger et al., 2022] [47]                                                                                                                                                                                                                                                                                                                                                                                    |
| Italy                       | 6           | [Dorizzi et al., 2021] [11],<br>[Dell'Utri et al., 2020] [42],<br>[Corrao et al., 2021] [13],<br>[Cena et al., 2021] [12],<br>[Brandell et al., 2021] [55],<br>[Giacomelli et al., 2021] [83]                                                                                                                                                                                                                                                                                                                       |
| Japan                       | 2           | [Komatsu et al., 2020] [48],<br>[Nakagawa et al., 2021] [37]                                                                                                                                                                                                                                                                                                                                                                                                                                                        |
| Multiple European Countries | 1           | [Ceulmans et al., 2021] [40]                                                                                                                                                                                                                                                                                                                                                                                                                                                                                        |
| The Netherlands             | 2           | [Cui et al., 2023] [64],<br>[Gamberini et al., 2023] [33]                                                                                                                                                                                                                                                                                                                                                                                                                                                           |
| New Zealand                 | 2           | [Rose et al., 2021] [79],<br>[Dixon et al., 2023] [31]                                                                                                                                                                                                                                                                                                                                                                                                                                                              |
| Norway                      | 1           | [Baravelli et al., 2022] [20]                                                                                                                                                                                                                                                                                                                                                                                                                                                                                       |
| Slovenia                    | 1           | [Munda et al., 2022] [46]                                                                                                                                                                                                                                                                                                                                                                                                                                                                                           |

*(Continued)*

Table 1. (Continued)

| Study Location  | #of Studies | Citation                                                                                                                                                                                                                                                                                                                                                                                                                                                                                                                                                                                                                                                                                                                                                                                                                                                                                                                                                                                                                                                                                   |
|-----------------|-------------|--------------------------------------------------------------------------------------------------------------------------------------------------------------------------------------------------------------------------------------------------------------------------------------------------------------------------------------------------------------------------------------------------------------------------------------------------------------------------------------------------------------------------------------------------------------------------------------------------------------------------------------------------------------------------------------------------------------------------------------------------------------------------------------------------------------------------------------------------------------------------------------------------------------------------------------------------------------------------------------------------------------------------------------------------------------------------------------------|
| Spain           | 4           | [Gonzalez-Timoneda et al., 2021] [49],<br>[Quirós-González et al., 2023] [86],<br>[Cruz-Ramos et al., 2023] [32],<br>[Suárez-Cortés et al., 2023] [96]                                                                                                                                                                                                                                                                                                                                                                                                                                                                                                                                                                                                                                                                                                                                                                                                                                                                                                                                     |
| Sweden          | 1           | [Zaigham et al., 2022] [44]                                                                                                                                                                                                                                                                                                                                                                                                                                                                                                                                                                                                                                                                                                                                                                                                                                                                                                                                                                                                                                                                |
| UK              | 19          | [Harkness et al., 2021] [45],<br>[Jardine et al., 2021] [22],<br>[Leung et al., 2021] [72],<br>[Lewis et al., 2021] [76],<br>[Rimmer et al., 2020] [30],<br>[Sarre et al., 2021] [16],<br>[John et al., 2021] [17],<br>[Riley et al., 2021] [29],<br>[Fletcher et al., 2021] [35],<br>[Silverio et al., 2021] [15],<br>[Aydin et al., 2022] [51],<br>[Bosó Pérez et al., 2022] [14],<br>[Balachandren et al., 2022] [78],<br>[Bekaert & Azzopardi, 2022] [80],<br>[Lowe-Zinola et al., 2022] [69],<br>[Moltrecht et al., 2022] [52],<br>[Montgomery et al., 2023] [18],<br>[Ma et al., 2022] [97],<br>[Wilson et al., 2022] [36]                                                                                                                                                                                                                                                                                                                                                                                                                                                           |
| Study Design    |             |                                                                                                                                                                                                                                                                                                                                                                                                                                                                                                                                                                                                                                                                                                                                                                                                                                                                                                                                                                                                                                                                                            |
| Cross-Sectional | 33          | [Jardine et al., 2021] [22],<br>[Dorizzi et al., 2021] [11],<br>[Homer et al., 2021] [41],<br>[Ceulmans et al., 2021] [40],<br>[Justman et al., 2020] [24],<br>[Rimmer et al., 2020] [30],<br>[Nakagawa et al., 2021] [37],<br>[Overbeck et al., 2020] [21],<br>[Harkness et al., 2021] [45],<br>[Komatsu et al., 2020] [48],<br>[Rose et al., 2021] [79],<br>[Lewis et al., 2021] [76],<br>[Weerasuria et al., 2021] [85],<br>[Cena et al., 2021] [12],<br>[Sarre et al., 2021] [16],<br>[Doncarli et al., 2021] [23],<br>[Fletcher et al., 2021] [35],<br>[Kluwgant et al., 2022] [38],<br>[Aydin et al., 2022] [51],<br>[Wilson et al., 2021] [36],<br>[Schaler et al., 2022] [66],<br>[Phillips et al., 2021] [74],<br>[Coombe et al., 2021] [77],<br>[Bittleston et al., 2022] [70],<br>[Wood et al., 2021] [81],<br>[Karavani et al., 2021] [67],<br>[Boisvert et al., 2022] [43],<br>[Zaigham et al., 2022] [44],<br>[Souleymanov et al., 2023] [82],<br>[Ma et al., 2022] [97],<br>[Khoury et al., 2022] [19],<br>[Suárez-Cortés et al., 2023] [96],<br>[Hertle et al., 2022] [34] |

(Continued)

Table 1. (Continued)

| Study Location | #of Studies | Citation                                                                                                                                                                                                                                                                                                                                                                                                                                                                                                                                                                                                                                                                                                                                                                                                       |
|----------------|-------------|----------------------------------------------------------------------------------------------------------------------------------------------------------------------------------------------------------------------------------------------------------------------------------------------------------------------------------------------------------------------------------------------------------------------------------------------------------------------------------------------------------------------------------------------------------------------------------------------------------------------------------------------------------------------------------------------------------------------------------------------------------------------------------------------------------------|
| Observational  | 24          | [Dell'Utri et al., 2020] [42],<br>[Leung et al., 2021] [72],<br>[Chow et al., 2021] [73],<br>[Traeger et al., 2021] [88],<br>[Corrao et al., 2021] [13],<br>[Trinh et al., 2022] [25],<br>[Potenza et al., 2021] [27],<br>[Binyamin et al., 2021] [50],<br>[Brandell et al., 2021] [55],<br>[Greene et al., 2022] [61],<br>[Lam et al., 2022] [65],<br>[Balachandren et al., 2022] [78],<br>[Bekaert & Azzopardi, 2021] [80],<br>[Giacomelli et al., 2021] [83],<br>[Lee et al., 2021] [84],<br>[El Moussaoui et al., 2021] [87],<br>[Gomez et al., 2021] [68],<br>[Munda et al., 2023] [46],<br>[Quirós-González et al., 2023] [86],<br>[Lowe-Zinola et al., 2022] [69],<br>[Baravelli et al., 2022] [20],<br>[Herzberger et al., 2022] [47],<br>[Mallaury et al., 2022] [59],<br>[Baaske et al., 2022] [71], |
| Mixed Methods  | 9           | [De Kort et al., 2021] [56],<br>[Bradfield et al., 2021] [26],<br>[Ennis et al., 2021] [57],<br>[Atay et al., 2021] [60],<br>[Rød et al., 2023] [63],<br>[Clark et al., 2023] [39],<br>[Cui et al., 2023] [64],<br>[Henry et al., 2022] [95],<br>[Wilson et al., 2022] [36]                                                                                                                                                                                                                                                                                                                                                                                                                                                                                                                                    |
| Qualitative    | 16          | [John et al., 2021] [17],<br>[Riley et al., 2021] [29],<br>[Silverio et al., 2021] [15],<br>[Gonzalez-Timoneda et al., 2020] [49],<br>[Cameron et al., 2021] [53],<br>[Hukku et al., 2022] [58],<br>[Bosó Pérez et al., 2022] [14],<br>[Sweet et al., 2021] [28],<br>[Ryu et al., 2023] [75],<br>[Newman et al., 2022] [62],<br>[Moltrecht et al., 2022] [52],<br>[Bayrampour & Tsui, 2023] [54],<br>[Montgomery et al., 2022] [18],<br>[Dixon et al., 2023] [31],<br>[Cruz-Ramos et al., 2023] [32],<br>[Gamberini et al., 2023] [33]                                                                                                                                                                                                                                                                         |
| Theme          |             |                                                                                                                                                                                                                                                                                                                                                                                                                                                                                                                                                                                                                                                                                                                                                                                                                |

(Continued)

Table 1. (Continued)

| Study Location   | #of Studies | Citation                                                                                                                                                                                                                                                                                                                                                                                                                                                                                                                                                                                                                                                                                                                                                                                                                                                                                                                                                                                                                                                                         |
|------------------|-------------|----------------------------------------------------------------------------------------------------------------------------------------------------------------------------------------------------------------------------------------------------------------------------------------------------------------------------------------------------------------------------------------------------------------------------------------------------------------------------------------------------------------------------------------------------------------------------------------------------------------------------------------------------------------------------------------------------------------------------------------------------------------------------------------------------------------------------------------------------------------------------------------------------------------------------------------------------------------------------------------------------------------------------------------------------------------------------------|
| Antepartum Care  | 33          | [Jardine et al., 2021] [22],<br>[Dorizzi et al., 2021] [11],<br>[Dell'Utri et al., 2020] [42],<br>[Homer et al., 2021] [41],<br>[Ceulmans et al., 2021] [40],<br>[Justman et al., 2020] [24],<br>[Rimmer et al., 2020] [30],<br>[Nakagawa et al., 2021] [37],<br>[Overbeck et al., 2020] [21],<br>[Corrao et al., 2021] [13],<br>[Bosó Pérez et al., 2022] [14],<br>[Silverio et al., 2021] [15],<br>[Cena et al., 2021] [12],<br>[Sarre et al., 2021] [16],<br>[John et al., 2021] [17],<br>[Doncarli et al., 2021] [23],<br>[Trinh et al., 2022] [25],<br>[Bradfield et al., 2021] [26],<br>[Potenza et al., 2021] [27],<br>[Sweet et al., 2021] [28],<br>[Riley et al., 2021] [29],<br>[Fletcher et al., 2021] [35]<br>[Clark et al., 2021] [39]<br>[Munda et al., 2022] [46]<br>[Baravelli et al., 2022] [20]<br>[Boisvert et al., 2023] [43]<br>[Zaighama et al., 2022] [44]<br>[Montgomery et al., 2022] [18]<br>[Wilson et al., 2022] [36]<br>[Khoury et al., 2023] [19]<br>[Cruz-Ramos et al., 2023] [32]<br>[Gamberini et al., 2023] [33]<br>[Hertle et al., 2022] [34] |
| Intrapartum Care | 23          | [Harkness et al., 2021] [45],<br>[Jardine et al., 2021] [22],<br>[Dorizzi et al., 2021] [11],<br>[Dell'Utri et al., 2020] [42],<br>[Homer et al., 2021] [41],<br>[Justman et al., 2020] [24],<br>[Rimmer et al., 2020] [30],<br>[Komatsu et al., 2020] [48],<br>[Kluwganta et al., 2022] [38],<br>[Bradfield et al., 2021] [26],<br>[Silverio et al., 2021] [15],<br>[Cena et al., 2021] [12],<br>[Binyamin et al., 2021] [50],<br>[Gonzalez-Timoneda et al., 2020] [49],<br>[Aydin et al., 2022] [51],<br>[Sweet et al., 2021] [28],<br>[Wilson et al., 2021] [36]<br>[Munda et al., 2023] [46]<br>[Haikin Herzberger et al., 2022] [47]<br>[Dixon et al., 2023] [31]<br>[Boisvert et al., 2023] [43]<br>[Zaigham et al., 2022] [44]<br>[Cruz-Ramos et al., 2023] [32]                                                                                                                                                                                                                                                                                                          |

(Continued)

Table 1. (Continued)

| Study Location                     | #of Studies | Citation                                                                                                                                                                                                                                                                                                                                                                                                                                                                                                            |
|------------------------------------|-------------|---------------------------------------------------------------------------------------------------------------------------------------------------------------------------------------------------------------------------------------------------------------------------------------------------------------------------------------------------------------------------------------------------------------------------------------------------------------------------------------------------------------------|
| Postpartum Care                    | 13          | [Jardine et al., 2021] [22],<br>[Ceulmans et al., 2021] [40],<br>[Bradfield et al., 2021] [26],<br>[Silverio et al., 2021] [15],<br>[Riley et al., 2021] [29],<br>[John et al., 2021] [17],<br>[Cameron et al., 2021] [53]<br>[Sweet et al., 2021] [28]<br>[Moltrecht et al., 2022] [52]<br>[Boisvert, et al., 2022] [43]<br>[Bayrampour et al., 2023] [54]<br>[Khoury et al., 2022] [19]<br>[Dixon et al., 2022] [31]                                                                                              |
| Abortion                           | 11          | [De Kort et al., 2021] [56],<br>[Brandell et al., 2021] [55],<br>[Greene et al., 2022] [61],<br>[Hukku et al., 2022] [58],<br>[Ennis et al., 2021] [57],<br>[Cena et al., 2021] [12],<br>[Atay et al., 2021] [60],<br>[Rød et al., 2023] [63],<br>[Cui et al., 2022] [64],<br>[Newman et al., 2022] [62]<br>[Mallaury et al., 2022] [59]                                                                                                                                                                            |
| Assisted Reproductive Technologies | 5           | [Komatsu et al., 2020] [48],<br>[Bosó Pérez et al., 2022] [14],<br>[Schaler et al., 2022] [66],<br>[Lam et al., 2021] [65]<br>[Karavani et al., 2021] [67]                                                                                                                                                                                                                                                                                                                                                          |
| Gynecology                         | 8           | [Dell'Utri et al., 2020] [42],<br>[Rimmer et al., 2020] [30],<br>[Komatsu et al., 2020] [48],<br>[Leung et al., 2021] [72],<br>[Gomez et al., 2021] [68],<br>[Bosó Pérez et al., 2021] [14],<br>[Bittleston et al., 2022] [70]<br>[Lowe-Zinola et al., 2022] [69]<br>[Newman et al., 2022] [62]<br>[Baaske et al., 2022] [71]                                                                                                                                                                                       |
| Sexual Health                      | 16          | [Chow et al., 2021] [73],<br>[Rose et al., 2021] [79],<br>[Bosó Pérez et al., 2022] [14],<br>[Balachandren et al., 2021] [78],<br>[Phillips et al., 2021] [74],<br>[Coombe et al., 2021] [77],<br>[Ennis et al., 2021] [57],<br>[Cena et al., 2021] [12],<br>[Bekaert & Azzopardi, 2021] [80],<br>[Bittleston et al., 2022] [70],<br>[Wood et al., 2021] [81]<br>[Lewis et al., 2021] [76]<br>[Newman et al. 2022] [62]<br>[Ryu et al., 2023] [75]<br>[Baaske et al., 2022] [71]<br>[Souleymanov et al., 2023] [82] |

(Continued)



Table 1. (Continued)

| Study Location | #of Studies | Citation                                                                                                                                                                                                                                                                                                                                 |
|----------------|-------------|------------------------------------------------------------------------------------------------------------------------------------------------------------------------------------------------------------------------------------------------------------------------------------------------------------------------------------------|
| HIV Care       | 10          | [Traeger et al., 2021] [88],<br>[Weerasuria et al., 2021] [85],<br>[Phillips et al., 2021] [74],<br>[Giacomelli et al., 2021] [83],<br>[Lee et al., 2021] [84],<br>[El Moussaoui et al., 2021] [87],<br>[Wood et al., 2021] [81]<br>[Newman et al., 2022] [62]<br>[Souleymanov et al., 2023] [82]<br>[Quirós-González et al., 2023] [86] |

<https://doi.org/10.1371/journal.pone.0294744.t001>

In fact, 23.4% of Italian peripartum facilities were partially or fully converted to COVID-19 units from March-May 2020 [12]. Data from the Italian National Health Service showed that 81% [compared to 99% in a reference cohort] of patients received an antepartum visit within 21 days prior to delivery during periods with strong restrictions [13]. Patients in the United Kingdom (UK), Canada, and Italy reported increased difficulty accessing antepartum care due to frequently re-scheduled or cancelled appointments [12, 14–19]. Decreased outpatient (17%) and primary care (10%) antepartum consultations were seen nationwide in Norway from March to April 2020 [20]. However, in Denmark, a survey of pregnant women indicated very few patients had antepartum consultations cancelled by their general practitioner (GP) or midwife due to COVID-19 [21]. With regards to screening services, 15% of UK National Health Service (NHS) units reported decreased screening for fetal anomalies; over 25% of women forewent ultrasounds, genetic screening, or toxoplasmosis screening in France due to COVID-19-related reasons; and a tertiary medical centre in Israel noted visits for ultrasounds decreased by 18% during the lockdown period compared to the previous year [22–24].

To address reduced access, alternative modes of service delivery were introduced. For example, physicians and midwives in the UK, New Zealand, Spain, the Netherlands, Germany, Canada, and Australia reported increased virtual and telephone consultations compared to before the pandemic [17–19, 22, 25–34]. Additionally, nearly 80% of UK NHS units switched to home blood pressure monitoring and 32–53% switched to home urine testing with obstetricians in both the UK and Australia recommending home blood pressure and weight self-monitoring [22, 28, 35, 36]. In a tertiary hospital in Japan, women were provided the option for home blood pressure and fetal heart rate monitoring [37].

In Andalusia, Spain, women reported self-swabbing for group B streptococcus screening [32]. Gestational diabetes protocols were altered in Australia [38], Canada [39], and the UK [16] switching to virtual monitoring and/or relying on solely fasting glucose concentrations for diagnosis. Few countries, including Slovenia and Italy, maintained traditional gestational diabetes screening protocols [46]. Many institutions in the UK, France, Italy, New Zealand, the Netherlands, Spain, Canada, and Australia implemented measures to decreased viral spread during in-person appointments including social distancing, equipment sanitization, limiting support persons during visits, and increased personal protective equipment [12, 16, 19, 23, 28, 29, 31–33, 40, 41].

Additionally, many institutions noted decreased admissions from the emergency room for antepartum patients, including 86% of NHS units [22]. In Milan, admissions for bleeding in pregnancy decreased by 46.6% and gestational diabetes by 47.1% [though admissions for pregnancy-induced hypertension increased by 2.1%] [42]. At an Israel tertiary medical centre, visits to the high-risk clinic decreased by 32.8% compared to the prior year [24]. In Norway, inpatient admissions were reduced by 9% nationwide [20].

Table 2. Summary of main results of the studies included in this review (N = 82).

| Authors                        | Country                                                            | Sample Size                                    | Participant Characteristics                                                      | Study Design        | Sampling Strategy  | Main Outcome Variables                                                                                                                                                                                                                                                                                                                                                | QuADS |
|--------------------------------|--------------------------------------------------------------------|------------------------------------------------|----------------------------------------------------------------------------------|---------------------|--------------------|-----------------------------------------------------------------------------------------------------------------------------------------------------------------------------------------------------------------------------------------------------------------------------------------------------------------------------------------------------------------------|-------|
| Atay et al., 2021 [60]         | France                                                             | 809                                            | Pregnant women                                                                   | Mixed methods       | Convenience        | <ul style="list-style-type: none"> <li>• Changes in telemedicine abortion service requests at different periods of lockdown</li> <li>• Restrictions to accessing abortion care during pandemic</li> </ul>                                                                                                                                                             | 27    |
| Aydin et al., 2022 [51]        | England                                                            | 477                                            | Expecting parents                                                                | Mixed methods       | Convenience        | <ul style="list-style-type: none"> <li>• Changes to birth and birth plan due to COVID-19</li> </ul>                                                                                                                                                                                                                                                                   | 30    |
| Baaske et al., 2022 [71]       | Canada                                                             | 3691                                           | Women aged 25–69                                                                 | Observational       | Consecutive clinic | <ul style="list-style-type: none"> <li>• Access to contraception</li> <li>• Participation in cervical and breast cancer screening</li> </ul>                                                                                                                                                                                                                          | 21    |
| Balachandren et al., 2022 [78] | United Kingdom                                                     | 9784                                           | Pregnant women                                                                   | Observational       | Population         | <ul style="list-style-type: none"> <li>• Access to contraception and pregnancy intentions</li> </ul>                                                                                                                                                                                                                                                                  | 31    |
| Baravelli et al., 2022 [20]    | Norway                                                             | 1 244 560                                      | Female residents of Norway age 15–50                                             | Observational       | Population         | <ul style="list-style-type: none"> <li>• Pregnancy-related inpatient, outpatient, and primary care health utilisation before, during, and after COVID-19 restrictions</li> </ul>                                                                                                                                                                                      | 32    |
| Bayrampour & Tsui, 2023 [54]   | Canada                                                             | 268                                            | Pregnant adults living in British Columbia                                       | Cross-sectional     | Purposive          | <ul style="list-style-type: none"> <li>• Access to postpartum healthcare services</li> </ul>                                                                                                                                                                                                                                                                          | 28    |
| Bekaert et al., 2021 [80]      | United Kingdom                                                     | Varies across variables                        | Youth aged 13–17                                                                 | Cross-sectional     | Consecutive clinic | <ul style="list-style-type: none"> <li>• Changes in the number of consultations before and during the pandemic</li> </ul>                                                                                                                                                                                                                                             | 19    |
| Binyamin et al., 2021 [50]     | Israel                                                             | 413                                            | Pregnant women receiving caesarean delivery                                      | Observational       | Consecutive clinic | <ul style="list-style-type: none"> <li>• Differences between rates of neuraxial anaesthesia before and during COVID-19 pandemic</li> </ul>                                                                                                                                                                                                                            | 25    |
| Bittleston et al., 2022 [70]   | Australia                                                          | 1056                                           | Predominantly female young adults (16–29 years old)                              | Cross-sectional     | Convenience        | <ul style="list-style-type: none"> <li>• Access to sexual health services</li> </ul>                                                                                                                                                                                                                                                                                  | 25    |
| Boisvert et al., 2022 [43]     | Canada                                                             | 216                                            | Women ≥ 16 years old who delivered during the first three months of the pandemic | Cross-sectional     | Convenience        | <ul style="list-style-type: none"> <li>• Perceived quality of prenatal care, intrapartum care, and postpartum care</li> </ul>                                                                                                                                                                                                                                         | 26    |
| Bosó Pérez et al., 2022 [14]   | United Kingdom                                                     | 20                                             | 14 women, 6 men                                                                  | Qualitative         | Purposive          | <ul style="list-style-type: none"> <li>• Themes related to unmet access to SRH during COVID-19</li> </ul>                                                                                                                                                                                                                                                             | 30    |
| Bradfield et al., 2022 [26]    | Australia                                                          | 620 surveys, 20 interviews                     | Registered midwives who provided care since March 2020                           | Mixed methods       | Convenience        | <ul style="list-style-type: none"> <li>• The experience of midwives providing care during COVID-19</li> </ul>                                                                                                                                                                                                                                                         | 32    |
| Brandell et al., 2021 [55]     | Italy                                                              | 778 requests                                   | Women seeking medical abortion through telemedicine service                      | Observational study | Convenience        | <ul style="list-style-type: none"> <li>• Changes in need/requests for telemedicine abortion prior to and during the pandemic</li> </ul>                                                                                                                                                                                                                               | 20    |
| Cena et al., 2021 [12]         | Italy                                                              | 77                                             | Italian perinatal healthcare facilities                                          | Cross-sectional     | Convenience        | <ul style="list-style-type: none"> <li>• Impact on the activities and services provided by perinatal health facilities due to COVID-19</li> </ul>                                                                                                                                                                                                                     | 32    |
| Ceulemans et al., 2021 [40]    | Belgium, Norway, Netherlands, Switzerland, Ireland, United Kingdom | 16063                                          | Pregnant and breastfeeding women; most between 31–35 years old                   | Cross-sectional     | Convenience        | <ul style="list-style-type: none"> <li>• Impact of COVID-19 on: 1) pregnancy experience; 2) breastfeeding practices &amp; support; 3) access to health services</li> </ul>                                                                                                                                                                                            | 27    |
| Chow et al., 2020 [73]         | Australia                                                          | 21576 consultations before and during lockdown | Men, women, and other individuals                                                | Observational       | Consecutive clinic | <ul style="list-style-type: none"> <li>• Number of consultations (total) and for each STI diagnosis pre-lockdown, lockdown, and post-lockdown</li> <li>• Number of consultations for asymptomatic screening and sex work certificates</li> <li>• Time from symptom onset to presentation</li> <li>• Number of sexual partners reported in each time period</li> </ul> | 32    |

(Continued)

Table 2. (Continued)

| Authors                        | Country         | Sample Size                                                     | Participant Characteristics                                                                                   | Study Design    | Sampling Strategy                  | Main Outcome Variables                                                                                                                                                                                                                                              | QuADS |
|--------------------------------|-----------------|-----------------------------------------------------------------|---------------------------------------------------------------------------------------------------------------|-----------------|------------------------------------|---------------------------------------------------------------------------------------------------------------------------------------------------------------------------------------------------------------------------------------------------------------------|-------|
| Clark et al., 2023 [39]        | Canada          | 85 surveys, 6 interviews                                        | Women with GDM who delivered at a tertiary care centre                                                        | Mixed methods   | Consecutive clinic and convenience | <ul style="list-style-type: none"> <li>Impact of virtual care on gestational diabetes-related outcomes, patient experience, and healthcare provider experience</li> </ul>                                                                                           | 31    |
| Coombe et al., 2021 [77]       | Australia       | 518                                                             | Females $\leq 50$ years old                                                                                   | Mixed-methods   | Convenience                        | <ul style="list-style-type: none"> <li>Impact of COVID-19 on sexual and reproductive health services, including access to SRH provider, contraception use and access, and of general SRH services.</li> </ul>                                                       | 28    |
| Corrao et al., 2021 [13]       | Italy           | 52312                                                           | Pregnant women who delivered in-hospital                                                                      | Observational   | Consecutive clinic                 | <ul style="list-style-type: none"> <li>Proportion of women who had at least a gynaecology visit within 21d of delivery</li> </ul>                                                                                                                                   | 26    |
| Cruz-Ramos et al., 2023 [32]   | Spain           | 14                                                              | Spanish women who delivered during the COVID-19 state of emergency                                            | Qualitative     | Purposive                          | <ul style="list-style-type: none"> <li>Prenatal, intrapartum, and postpartum experiences and expectations</li> </ul>                                                                                                                                                | 26    |
| Cui et al., 2023 [64]          | The Netherlands | 178                                                             | Women aged 19–40 who accessed Women on Web (WoW) for telemedicine abortion                                    | Mixed methods   | Convenience                        | <ul style="list-style-type: none"> <li>Accessibility of abortion services during the COVID-19 pandemic</li> </ul>                                                                                                                                                   | 21    |
| De Kort et al., 2021 [56]      | Belgium         | 11                                                              | Abortion centre clinic coordinator (1 female), psychosocial staff (7 female), physicians (2 female, 1 male)   | Qualitative     | Purposive                          | <ul style="list-style-type: none"> <li>Differences in the prevalence of abortion requests and actual abortions during lockdown</li> <li>Procedure changes at the abortion clinic</li> <li>Influence of COVID-19 protective measures on staff and clients</li> </ul> | 24    |
| Dell'Utri et al., 2020 [42]    | Italy           | Pre-COVID-19: 5644 admissions; during pandemic: 3647 admissions | Women of all ages and nationalities                                                                           | Observational   | Consecutive clinic                 | <ul style="list-style-type: none"> <li>Admission rates in obstetrics and gynaecology emergency services</li> </ul>                                                                                                                                                  | 29    |
| Dixon et al., 2023 [31]        | New Zealand     | 17                                                              | Women living in Aotearoa, New Zealand                                                                         | Qualitative     | Purposive                          | <ul style="list-style-type: none"> <li>Prenatal, intrapartum, and postpartum experiences</li> </ul>                                                                                                                                                                 | 24    |
| Doncarli et al., 2021 [23]     | France          | 500                                                             | Women pregnant between March 17th and May 11th, 2020                                                          | Cross-sectional | Quota                              | <ul style="list-style-type: none"> <li>The impacts of the first lockdown in France on the frequency of voluntary changes in pregnancy monitoring and associated factors</li> </ul>                                                                                  | 26    |
| Dorizzi et al., 2021 [11]      | Italy           | 104                                                             | Pregnant women, mean age 32.5                                                                                 | Cross-sectional | Convenience                        | <ul style="list-style-type: none"> <li>Major worries during pregnancy and while in hospital</li> <li>Access to prenatal services / online courses</li> <li>Patient perception of safety and quality of service</li> </ul>                                           | 29    |
| El Moussaoui et al., 2021 [87] | Belgium         | Varies across variables                                         | People living with HIV                                                                                        | Observational   | Consecutive clinic                 | <ul style="list-style-type: none"> <li>Number of new HIV diagnoses, medical care delays</li> <li>Testing and HIV co-infections and comorbidities</li> </ul>                                                                                                         | 18    |
| Ennis et al., 2021 [57]        | Canada          | 307 (first) and 78 (second)                                     | Abortion health care professionals, including physicians, nurse practitioners, pharmacists and administrators | Mixed methods   | Convenience                        | <ul style="list-style-type: none"> <li>Impact of pandemic on access to abortion care</li> <li>Impact of pandemic on change of abortion practice and delivery</li> </ul>                                                                                             | 24    |

(Continued)

Table 2. (Continued)

| Authors                             | Country         | Sample Size                                                       | Participant Characteristics                                                                                         | Study Design    | Sampling Strategy  | Main Outcome Variables                                                                                                                                                                                                                                                                                           | QuADS |
|-------------------------------------|-----------------|-------------------------------------------------------------------|---------------------------------------------------------------------------------------------------------------------|-----------------|--------------------|------------------------------------------------------------------------------------------------------------------------------------------------------------------------------------------------------------------------------------------------------------------------------------------------------------------|-------|
| Fletcher et al., 2021 [35]          | United Kingdom  | 251                                                               | Obstetricians                                                                                                       | Cross-sectional | Convenience        | <ul style="list-style-type: none"> <li>Views of obstetricians regarding self-monitoring for hypertensive disorders of pregnancy during COVID-19</li> </ul>                                                                                                                                                       | 25    |
| Gamberini et al., 2023 [33]         | The Netherlands | 9 documents; 20 interviews                                        | Documents describing antenatal care services; midwives and gynaecologists working in antenatal care                 | Qualitative     | Purposive          | <ul style="list-style-type: none"> <li>Guideline recommendations for antenatal care adaptations</li> <li>Impact of COVID-19 on healthcare providers and healthcare delivery practices</li> </ul>                                                                                                                 | 32    |
| Giacomelli et al., 2021 [83]        | Italy           | 70,349 HIV-RNA viral load determinations                          | Patients living with HIV attending outpatient clinic                                                                | Observational   | Consecutive clinic | <ul style="list-style-type: none"> <li>Yearly HIV-RNA viral suppression rates and determinations</li> <li>Medication collection and virological appointment attendance before and during COVID-19</li> <li>Trends of HIV-RNA determinations <math>\geq 50</math> copies/mL before and during COVID-19</li> </ul> | 29    |
| Gomez et al., 2021 [68]             | Canada          | 39,691                                                            | Patients presenting to the emergency department with appendicitis, cholecystitis, ectopic pregnancy, or miscarriage | Observational   | Consecutive clinic | <ul style="list-style-type: none"> <li>Weekly rates of visits to the ED during the COVID-19 pandemic for certain presentations</li> </ul>                                                                                                                                                                        | 29    |
| Gonzalez-Timoneda et al., 2020 [49] | Spain           | 14                                                                | Midwives                                                                                                            | Qualitative     | Purposive          | <ul style="list-style-type: none"> <li>Challenges and differences with working as a midwife in a pandemic</li> </ul>                                                                                                                                                                                             | 30    |
| Greene et al., 2022 [61]            | Ireland         | 764 requests for online telemedicine abortion care, 225 completed | Pregnant women seeking or interested in abortion                                                                    | Mixed methods   | Convenience        | <ul style="list-style-type: none"> <li>Impact of COVID-19 restrictions on telemedicine abortion requests among patients seeking Women on Web service</li> </ul>                                                                                                                                                  | 32    |
| Harkness et al., 2021 [45]          | United Kingdom  | 92 United Kingdom Boards and Trusts                               | Senior obstetricians and midwives                                                                                   | Cross-sectional | Convenience        | <ul style="list-style-type: none"> <li>Changes in induction of labour (IOL) rates and practice</li> <li>Impact on home cervical ripening</li> <li>Women's responses to IOL as reported by staff</li> </ul>                                                                                                       | 23    |
| Henry et al., 2022 [95]             | Australia       | 109 s, 17 interviews                                              | Healthcare providers of pregnancy and birth care                                                                    | Mixed methods   | Convenience        | <ul style="list-style-type: none"> <li>Impact of COVID-19 on delivery, timeliness, and quality of pregnancy care</li> </ul>                                                                                                                                                                                      | 30    |
| Hertle et al., 2022 [34]            | Germany         | 1821 women; 1551 midwives                                         | Women $\geq 18$ years old who gave birth between May-November 2020; Midwives working in Germany in 2020             | Cross-sectional | Convenience        | <ul style="list-style-type: none"> <li>Impact of COVID-19 on the delivery of prenatal care by midwives</li> </ul>                                                                                                                                                                                                | 27    |
| Herzberger et al., 2022 [47]        | Israel          | 5563                                                              | Women admitted for delivery                                                                                         | Observational   | Consecutive clinic | <ul style="list-style-type: none"> <li>Intrapartum maternal and perinatal outcomes</li> </ul>                                                                                                                                                                                                                    | 25    |
| Homer et al., 2021 [41]             | Australia       | 103                                                               | Privately practising midwives                                                                                       | Cross-sectional | Convenience        | <ul style="list-style-type: none"> <li>Changes in demand for home births</li> <li>Obtaining information on COVID-19</li> <li>Preparation and planning for COVID-19</li> <li>Altering practice to accommodate COVID-19 precautions</li> </ul>                                                                     | 26    |

(Continued)

Table 2. (Continued)

| Authors                    | Country        | Sample Size | Participant Characteristics                                                       | Study Design    | Sampling Strategy    | Main Outcome Variables                                                                                                                                                                                                                                                                                                                                                                                      | QuADS |
|----------------------------|----------------|-------------|-----------------------------------------------------------------------------------|-----------------|----------------------|-------------------------------------------------------------------------------------------------------------------------------------------------------------------------------------------------------------------------------------------------------------------------------------------------------------------------------------------------------------------------------------------------------------|-------|
| Hukku et al., 2022 [58]    | Canada         | 23          | Participants identifying as “women” and who have had an abortion after March 2020 | Qualitative     | Purposive            | <ul style="list-style-type: none"> <li>• Impact of COVID-19 on deciding to get an abortion and the type of abortion</li> </ul>                                                                                                                                                                                                                                                                              | 23    |
| Jardine et al., 2021 [22]  | United Kingdom | 81          | Obstetric units in the United Kingdom                                             | Cross-sectional | Convenience          | <ul style="list-style-type: none"> <li>• Service modifications to maternity services made during the pandemic.</li> </ul>                                                                                                                                                                                                                                                                                   | 29    |
| John et al., 2021 [17]     | United Kingdom | 16          | Pregnant and postpartum women belonging to ethnic minority communities            | Qualitative     | Purposive            | <ul style="list-style-type: none"> <li>• Themes related to women’s experience in maternity care during COVID-19</li> </ul>                                                                                                                                                                                                                                                                                  | 29    |
| Justman et al., 2020 [24]  | Israel         | 1352        | Pregnant women, mean age 30.6, registered at the clinic                           | Cross-sectional | Consecutive clinic   | <ul style="list-style-type: none"> <li>• Changes in outpatient clinic visits during the COVID-19 outbreak</li> <li>• Changes in the rates of caesarean and instrumental deliveries during the COVID-19 outbreak</li> <li>• Changes in neonatal and maternal outcomes during the COVID-19 outbreak</li> </ul>                                                                                                | 27    |
| Karavani et al., 2021 [67] | Israel         | 90          | IVF clinic appointments                                                           | Cross-sectional | Consecutive clinic   | <ul style="list-style-type: none"> <li>• Impact of COVID-19 on tertiary fertility service</li> </ul>                                                                                                                                                                                                                                                                                                        |       |
| Khoury et al., 2022 [19]   | Canada         | 265         | Women $\leq$ 36 weeks gestation $\geq$ 18 years old                               | Cross-sectional | Convenience          | <ul style="list-style-type: none"> <li>• Prenatal care and intrapartum outcomes</li> <li>• Access to prenatal care</li> </ul>                                                                                                                                                                                                                                                                               | 25    |
| Kluwgant et al., 2022 [38] | Australia      | 1676        | Women who delivered and midwives who worked during the COVID-19 pandemic          | Cross-sectional | Convenience          | <ul style="list-style-type: none"> <li>• Experiences of pregnant women seeking sexual and reproductive health services during COVID-19 and factors related to their care and services</li> </ul>                                                                                                                                                                                                            | 32    |
| Komatsu et al., 2020 [48]  | Japan          | 2446        | Members of Japanese Society of Obstetrics and Gynecology (JSOG)                   | Cross-sectional | Convenience          | <ul style="list-style-type: none"> <li>• Changes in number of patients (pregnant women, operations for gynaecological malignancies and benign gynaecological conditions, treatments for gynaecological malignancy and reproductive technologies)</li> <li>• Prevalence of countermeasures to COVID-19 (including screening policy)</li> <li>• Delivery modes in COVID-19 positive pregnant women</li> </ul> | 26    |
| Lam et al., 2022 [65]      | Canada         | NA          | NA                                                                                | Observational   | Consecutive clinical | <ul style="list-style-type: none"> <li>• Impact of COVID-19 on the availability and access to fertility services. Procedural volume of fertility services, including in vitro fertilisation and intracytoplasmic sperm injections, frozen embryo transfers, intrauterine and donor inseminations.</li> </ul>                                                                                                | 14    |

(Continued)

Table 2. (Continued)

| Authors                       | Country        | Sample Size | Participant Characteristics                                                        | Study Design    | Sampling Strategy    | Main Outcome Variables                                                                                                                                                                                                                                                                          | QuADS |
|-------------------------------|----------------|-------------|------------------------------------------------------------------------------------|-----------------|----------------------|-------------------------------------------------------------------------------------------------------------------------------------------------------------------------------------------------------------------------------------------------------------------------------------------------|-------|
| Lee et al., 2021 [84]         | Australia      | 4551        | People living with HIV                                                             | Cross-sectional | Consecutive clinical | <ul style="list-style-type: none"> <li>Impact of lockdown on access to antiretroviral therapy, including proportion of antiretroviral therapy provided to patients through mail access, and number of patients with controlled viral load</li> </ul>                                            | 25    |
| Leung et al., 2020 [72]       | United Kingdom | 585         | Operations on patients who received surgery for gynecological cancer               | Observational   | Consecutive clinical | <ul style="list-style-type: none"> <li>Changes to the surgical workflow due to COVID-19</li> <li>Differences in the surgical procedures performed between the time periods</li> <li>Intraoperative and early post-operative outcomes</li> <li>Impact on staff wellbeing and training</li> </ul> | 30    |
| Lewis et al., 2021 [76]       | Scotland       | 2005        | Young adults [16–24] living in Scotland                                            | Cross-sectional | Convenience          | <ul style="list-style-type: none"> <li>Impacts of pandemic mitigation measures on young people's access to, and use of, condoms and contraception.</li> </ul>                                                                                                                                   | 29    |
| Lowe-Zinola et al., 2022 [69] | United Kingdom | 1943        | Women with gynaecological cancer at a tertiary cancer centre                       | Observational   | Consecutive clinical | <ul style="list-style-type: none"> <li>Decision alterations from standard of care due to COVID-19</li> <li>Outcomes of patients whose decisions altered from the standard of care</li> </ul>                                                                                                    | 27    |
| Ma et al., 2022 [97]          | United Kingdom | 214         | Women aged 16–54 seeking or using contraception during the first COVID-19 lockdown | Cross-sectional | Convenience          | <ul style="list-style-type: none"> <li>Access to contraception during the COVID-19 lockdown</li> </ul>                                                                                                                                                                                          | 21    |
| Mallaury et al., 2022 [59]    | France         | 44 898      | Women who had an abortion                                                          | Observational   | Population           | <ul style="list-style-type: none"> <li>Abortion-related clinical outcomes</li> </ul>                                                                                                                                                                                                            | 24    |
| Moltrecht et al., 2022 [52]   | United Kingdom | 17          | Healthcare providers of perinatal care services                                    | Qualitative     | Purposive            | <ul style="list-style-type: none"> <li>Healthcare providers' perceptions of the needs of young parents during COVID-19 and the impact of COVID-19 on perinatal care delivery</li> </ul>                                                                                                         | 28    |
| Montgomery et al., 2022 [18]  | United Kingdom | 23          | Women who received maternity care in South London                                  | Qualitative     | Purposive            | <ul style="list-style-type: none"> <li>Impact of COVID-19 on the psychosocial experiences of pregnancy and maternal care</li> </ul>                                                                                                                                                             | 28    |
| Munda et al., 2022 [46]       | Slovenia       | 847         | Women who received a GDM diagnosis during the pre-COVID-19 and COVID-19 periods    | Observational   | Consecutive clinic   | <ul style="list-style-type: none"> <li>Glycemic control, weight gain, maternal outcomes, and perinatal outcomes</li> </ul>                                                                                                                                                                      | 26    |
| Nakagawa et al., 2021 [37]    | Japan          | 77          | Pregnant women                                                                     | Cross-sectional | Convenience          | <ul style="list-style-type: none"> <li>Acceptability of telemedicine by pregnant women</li> <li>Experiences with video call system and telemedicine consultation for prenatal check-ups</li> <li>Experience with mobile CTG device and associated costs for prenatal check-ups</li> </ul>       | 24    |

(Continued)

Table 2. (Continued)

| Authors                           | Country        | Sample Size          | Participant Characteristics                                                                  | Study Design    | Sampling Strategy    | Main Outcome Variables                                                                                                                                                                                                                                                  | QuADS |
|-----------------------------------|----------------|----------------------|----------------------------------------------------------------------------------------------|-----------------|----------------------|-------------------------------------------------------------------------------------------------------------------------------------------------------------------------------------------------------------------------------------------------------------------------|-------|
| Newman et al., 2022 [62]          | Australia      | 15                   | Healthcare workers in public sexual health services                                          | Qualitative     | Purposive            | <ul style="list-style-type: none"> <li>• Adaptations in sexual and reproductive health care during COVID-19</li> <li>• Impact of these adaptations on quality of care</li> </ul>                                                                                        | 18    |
| Overbeck et al., 2020 [21]        | Denmark        | 257                  | Pregnant women                                                                               | Cross-sectional | Convenience          | <ul style="list-style-type: none"> <li>• Cancellation of scheduled antenatal appointments with general practitioners and midwives</li> <li>• Concerns about difficulty in accessing healthcare and factors that could improve care</li> </ul>                           | 23    |
| Phillips et al., 2021 [74]        | Australia      | 20                   | Directors of public sexual health clinics                                                    | Cross-sectional | Convenience          | <ul style="list-style-type: none"> <li>• Changes to service operations, patient intake and consultations, including for high-risk populations</li> <li>• Changes in STI sample testing and collection</li> <li>• Changes to service due to COVID-19 measures</li> </ul> | 27    |
| Potenza et al., 2021 [27]         | Australia      | 2,882,966            | Antenatal attendances from January 2018 to April 2021                                        | Observational   | Consecutive clinical | <ul style="list-style-type: none"> <li>• Trends in maternity care consultations and uptake of telehealth</li> </ul>                                                                                                                                                     | 16    |
| Quiros-Gonzalez et al., 2023 [86] | Spain          | 2760                 | People with HIV who attended an HIV infection unit from 2016–2020                            | Observational   | Consecutive clinical | <ul style="list-style-type: none"> <li>• Impact of COVID-19 on clinical outcomes, emergency room visits or hospital admissions, and HIV disease control</li> </ul>                                                                                                      | 26    |
| Riley et al., 2021 [29]           | United Kingdom | 25 interviews        | Pregnant women                                                                               | Qualitative     | Purposive            | <ul style="list-style-type: none"> <li>• The impact of COVID-19 restrictions on the antenatal and postpartum experience</li> </ul>                                                                                                                                      | 22    |
| Rimmer et al., 2020 [30]          | United Kingdom | 148                  | NHS units                                                                                    | Cross-sectional | Convenience          | <ul style="list-style-type: none"> <li>• Changes in maternity services</li> <li>• Changes to gynaecology services</li> <li>• Training specific to COVID-19</li> </ul>                                                                                                   | 23    |
| Rød et al., 2023 [63]             | Germany        | 2057 s; 8 interviews | Women requesting telemedicine abortion; healthcare professionals providing abortion services | Mixed methods   | Convenience          | <ul style="list-style-type: none"> <li>• Reasons for choosing telemedicine</li> <li>• Perceptions of healthcare providers on access to abortion during COVID-19</li> </ul>                                                                                              | 29    |
| Rose et al., 2021 [79]            | New Zealand    | 500                  | 15–24 year olds                                                                              | Cross-sectional | Convenience          | <ul style="list-style-type: none"> <li>• Current and future sexual healthcare needs</li> <li>• Telehealth consultation experience</li> </ul>                                                                                                                            | 29    |
| Ryu et al., 2023 [75]             | Canada         | 18                   | Sexual health service providers                                                              | Qualitative     | Purposive            | <ul style="list-style-type: none"> <li>• Impact of COVID-19 on access to sexually transmitted infections and adaptations to care</li> </ul>                                                                                                                             | 27    |
| Sarre et al., 2021 [16]           | United Kingdom | 60                   | Women in the 2nd or 3rd trimester with diabetes or gestational diabetes                      | Cross-sectional | Convenience          | <ul style="list-style-type: none"> <li>• Experience of women using antenatal diabetes services during COVID-19</li> </ul>                                                                                                                                               | 25    |
| Schaler et al., 2022 [66]         | Ireland        | 135                  | Men and women scheduled for appointments at private not-for-profit fertility clinic          | Cross-sectional | Convenience          | <ul style="list-style-type: none"> <li>• Disruption to fertility services</li> </ul>                                                                                                                                                                                    | 20    |

(Continued)

Table 2. (Continued)

| Authors                            | Country        | Sample Size                                           | Participant Characteristics                                                                      | Study Design    | Sampling Strategy    | Main Outcome Variables                                                                                                | QuADS |
|------------------------------------|----------------|-------------------------------------------------------|--------------------------------------------------------------------------------------------------|-----------------|----------------------|-----------------------------------------------------------------------------------------------------------------------|-------|
| Souleymanov et al., 2023 [82]      | Canada         | 366                                                   | Men $\geq$ 18 years old living in Manitoba who identify as gay, bisexual, queer, or two-spirit   | Cross-sectional | Convenience          | • Access to HIV testing<br>Condom use practices                                                                       | 31    |
| Silverio et al., 2021 [15]         | United Kingdom | 23                                                    | Women who delivered from March-August 2020                                                       | Qualitative     | Purposive            | • Changes experienced to care delivery during COVID-19                                                                | 31    |
| Stirling Cameron et al., 2021 [53] | Canada         | 8                                                     | Postpartum, Syrian refugee women living in Nova Scotia, Canada, with a child under 12 months old | Qualitative     | Purposive            | • Impact of COVID-19 postpartum and pregnancy experience                                                              | 25    |
| Suárez-Cortés et al., 2023 [96]    | Spain          | 434                                                   | Women $\geq$ 18 years old who gave birth in the Murcia region                                    | Cross-sectional | Convenience          | • Changes to postpartum care delivery                                                                                 | 28    |
| Sweet et al., 2021 [28]            | Australia      | 27                                                    | Pregnant and postpartum women                                                                    | Qualitative     | Purposive            | • The experiences of women receiving maternity care during COVID-19                                                   | 17    |
| Traeger et al., 2021 [88]          | Australia      | 19876                                                 | Gay and bisexual men                                                                             | Observational   | Consecutive clinical | • Number of PrEP prescriptions per week                                                                               | 27    |
| Trinh et al., 2022 [25]            | Australia      | 24,650                                                | Women who delivered in the Local Health District of New South Wales                              | Observational   | Population           | • The impact of COVID-19 on changes in the use of telehealth                                                          | 22    |
| Weerasuria et al., 2021 [85]       | Australia      | 153                                                   | People living with HIV                                                                           | Cross-sectional | Convenience          | • Access to antiretroviral therapy for HIV                                                                            | 20    |
| Wilson et al., 2022 [36]           | Australia      | 3364                                                  | Women who are currently pregnant or recently given birth                                         | Cross-sectional | Convenience          | • Changes to birth plan due to pandemic<br>Changes to antenatal care delivery due to COVID-19<br>Maternity experience | 22    |
| Wilson et al., 2022 [36]           | United Kingdom | 45 maternity units; 166 pregnant women; 23 interviews | Maternity units; pregnant women; postpartum women                                                | Mixed methods   | Convenience          | • Use of and perspectives on self-monitored blood pressure<br>Perceived experiences of maternity care provision       | 24    |
| Wood et al., 2022 [81]             | Canada         | 1504                                                  | University students between 18–24 years old                                                      | Cross-sectional | Convenience          | • Perceived impact of COVID-19 on access to sexual health services                                                    | 31    |
| Zaigham et al., 2022 [44]          | Sweden         | 5003                                                  | Women who gave birth in Sweden                                                                   | Cross-sectional | Convenience          | • Maternal outcomes and perceived quality of prenatal and intrapartum care                                            | 24    |

<https://doi.org/10.1371/journal.pone.0294744.t002>

At tertiary hospitals in Canada and Sweden, approximately 50% of surveyed patients reported COVID-19 negatively impacted the quality of their prenatal care [43, 44].

### Intrapartum care

Twenty-three examined the impact of COVID-19 on intrapartum care. There were mixed results on the impact of COVID-19 on induction of labour [IOL], including the mode of delivery and location of birth. Three studies found no or little change to the number of inductions performed [24, 45, 46]. However, in the UK, 23% of Trusts and Boards switched to mechanical induction exclusively as it was perceived as safer for home use [45]. Further, 17% of UK maternity units temporarily paused some indications for IOL [22], and some UK practices ceased or reduced IOL [30]. Forty-two percent of clinics transformed their induction services to reduce hospitalizations or time in hospital [30]. Midwives working in Australian hospitals reported



varying experiences with some reporting decreased IOL frequency [26]. However, studies in Italy [42] and Israel [47] reported slightly increased IOL rates during the pandemic compared to pre-pandemic.

There were reported changes in vaginal and caesarean births. An Israel-based study found increased operative vaginal births among nulliparous women due to less prepartum care and more high-risk pregnancies during the pandemic [24]. With regards to caesarean births, there was a spectrum of responses. An Italian study found increased elective caesarean births, aligned with shifts to planned labours to decrease time in hospital [42]. Some practices in the UK offered more opportunities for elective caesarean section, while others stopped or limited opportunities [30]. Some midwives in Australia reported fewer caesarean sections while others reported no change [26], and there were no significant differences in caesarean births among women diagnosed with gestational diabetes before and during COVID-19 in Slovenia [46]. Some COVID-19 positive women in Japan had mandatory caesarean sections due to the likelihood of transmitting COVID-19 during labour due to heavy breathing [48]. In the UK, most facilities had a designated COVID-19 operating theatre for COVID-19 positive women [30]. Similarly, in Spain, a study reported that COVID-19 positive women were set up in specific birth rooms [49]. One study in Israel reported increased neuraxial anaesthesia rates instead of general anaesthesia for elective caesarean births [50].

Additionally, there was increased interest in home labour and delivery services due to restrictions on having loved ones present during labour, fear of contracting COVID-19, and restricted hospital birthing options [11, 26, 31, 38, 45]. For example, in an Australian study, 93% of privately practising midwives reported patients having greater interest in home births [41]. In addition, 28% of UK trusts and boards reported increased numbers of women returning home for cervical ripening [45]. Some midwives in Australia and the UK allowed loved ones to be present during labour, but limited the number that could attend during delivery [26, 41]. However, while women in Australia and the UK denied any significant changes in birth plans due to COVID-19 [36, 51], there were still meaningful differences such as reported prohibitions on water or home birth in the UK [22, 51]. For example, a UK study found that 59% of obstetric units prohibited home or freestanding midwife-led births and 32% changed their provision of water birth [22].

A few studies reported on quality of care during labour. In a Canadian study, 59% of women reported that COVID-19 did not affect their quality of care during labour, although 19% felt unfavourably about PPE requirements during labour and that it affected their birthing experience [43]. A Swedish study reported that half of women who had a caesarean section and 47% of women who went into labour reported that COVID-19 resulted in reduced overall quality of care [44].

## Postpartum care

Thirteen studies reported on the impact of COVID-19 on postpartum care. Studies in the UK, New Zealand, Canada, and Australia reported substantial and heterogeneous maternity service modifications, including reductions in postnatal appointments, additions of postpartum clinics in community settings, and changes from in-person to telephone and videoconferencing appointments [15, 22, 26, 29, 31, 43]. Two studies in the UK and one in Canada reported that young parents [52], women [15] and specifically, ethnic minority women [17], and refugee women [53] found that virtual care was inaccessible, not as effective, and inappropriate for postnatal care. A Canadian study found that 68.52% of patients reported COVID-19 negatively impacted postpartum care [43]. Meanwhile, a minority of obstetric units in the UK reported having no change in postpartum care [22].

Multinational studies reported that the pandemic adversely impacted access to postpartum services and supports, notably breastfeeding support, new parent classes, and in-home postpartum visits [19, 28, 29, 40, 54]. For example, compared to before COVID-19, less medical follow-up was reported from perinatal organisations, lactation consultants, general practitioners, and midwives [19, 40]. Insufficient support from healthcare professionals on breastfeeding was noted as one of the main reasons for breastfeeding cessation [40]. Studies in Canada, Australia, New Zealand, and the UK reported limitations on in-hospital support people during postpartum care [15, 26, 31, 52–54].

## Abortion

Twelve studies reported on the impact of COVID-19 on abortion access. There is some evidence that demand for abortion may have been impacted by COVID-19 [12, 55–57]. Varied levels of access and policy responses were reported, even within countries. One study across Canada found varying results where many abortion providers reported that the pandemic did not impact their ability to provide access, while some abortion providers reported barriers to timely care, fewer requests for abortion, and fewer operating theatres available [57]. Another Canadian study reported that COVID-19 exacerbated existing barriers to abortion care, especially with regards to the timeliness of multiple in-person appointments; however, all study participants were able to successfully access abortion care during the pandemic [58]. A French study reported decrease in total number of abortion, but increase in number of medical abortions for adapted access [59].

There was an increase in number of medical abortions provided via telehealth [55, 56, 60–64]. A study in the Netherlands reported that 37% of participants accessed telemedicine for abortion due to COVID-19 and was correlated with not living in a city with an abortion clinic [64]. Similarly, a study in Germany reported that 38.8% of participants accessed telemedicine for abortion due to COVID-19 and the factors that impacted access included socioeconomic status, disability, language, place of residence, caring responsibilities, home environment, and refugee and immigrant status [63]. One study in Belgium showed decreased abortion requests during the pandemic, as well as a decreased number of abortions performed [56]. However, studies in Italy [55], France [60], and Ireland [61] showed an increase in the raw number of telemedicine abortion requests during the pandemic [55], and many participants reported that COVID-19 was the reason for consulting the telemedicine service [60, 61].

## Assisted reproductive technology [ART]

Five studies reported on the impact of COVID-19 on access to ART. International studies found that ART treatments decreased during the pandemic and were either postponed or cancelled [48, 65]. A study conducted in Ireland at a fertility clinic reported that over 85% of participants experienced disruptions in their fertility journey due to the initial COVID-19 lockdown (March–May 2020) [66]. A study at a tertiary teaching hospital reported that all new IVF cycles were cancelled in March 2020 and all existing appointments were given alternatives [67]. As a result, 37.8% of patients continued with in-person appointments, while 30% chose telemedicine appointments, and 32.2% of patients cancelled their appointments [67]. In Japan, 74.3% of facilities that provide treatments in reproductive technologies reported decrease in treatments [48].

## Gynaecology

Ten studies reported the impact of COVID-19 on gynaecological services. Overall, studies highlighted the suspension of elective gynaecological services and reduced surgical and

oncology capacity due to the pandemic. In the UK, 88.5% of NHS units suspended elective urogynaecology services and 43.9% instituted protocols to avoid emergency laparotomy in women with suspected or confirmed COVID-19 [30]. Many NHS units instituted medical management of miscarriage and confirmed ectopic pregnancy as first-line treatment to reduce inpatient stays, however, a study in Canada reported no changes in the frequency of medical or surgical management [30, 68]. A study in Japan noted decreased surgeries for benign gynaecological conditions in 2020 vs. 2019 [48]. A study in Italy noted significantly decreased admissions for gynaecological complaints in 2020 vs. 2019 [42]. In Canada, there was a sustained decrease in weekly ER visits for miscarriage with no increased demand after lockdowns were lifted, suggesting that miscarriage management may have been shifted to outpatient clinics [68].

Studies in the UK and Japan noted reduced operations and treatments for gynaecological malignancies [30, 48]. In a tertiary gynecology centre in the UK, 2% of operations for gynecological malignancy were deferred or cancelled due to COVID-19, most often due to limited critical care and operating theatre capacity [69]. Additionally, participants in the UK, Canada, and Australia described difficulties accessing and delays in cervical cancer screening [14, 62, 70, 71].

Many institutions in the UK made changes to surgical care delivery including COVID-19 testing of patients, surgical team COVID-19 screening, weekly capacity reviews, eye protection, movement of operations to a different site, and strategies to decrease risk of aerosol-generating procedures [72]. These institutions also found significantly higher 30-day postoperative complication rates in 2020 compared with 2019, potentially due to transfer of care to new settings and decreased accessibility of primary care [72].

## Sexual health services

Sixteen studies reported that COVID-19 contributed to varying degrees of reduced access or use of available sexual health services. Studies in Australia found reduced STI consultations before lockdown compared to during lockdown [73] a move toward telehealth for testing services [62, 74]. Similarly, sexual health providers in Canada emphasised severe reductions in the availability of sexually transmitted and blood-borne infection testing due to government deployment of staff toward the COVID-19 response; thus, some clinics closed or adopted fewer hours [75]. This study reported the adoption of two models of care: 1) a “quick clinic” for asymptomatic patients to self-test for gonorrhoea and chlamydia at the clinic, but not for tests that require blood (e.g., HIV); and 2) a virtual clinic which replaced most in-person testing services, with few exceptions for high-risk clients; virtual clinics were seen as largely acceptable across participants [75].

Numerous studies reported reduced access or delays in receiving contraception care. One-quarter of adolescents and young adults in a Scottish study self-reported reduced access to and use of contraceptives and condoms due to the pandemic [76]. In an Italian study, 51.5% of participants reported that the pandemic adversely impacted procreative and contraceptive counselling services [12]. In Australia during the lockdown, 9% of women experienced increased difficulty accessing contraception, due to: lower stock of medication, challenges booking appointments for long-acting reversible contraception, less ability or desire to leave their residence due to COVID-19, their living situation, and fear of COVID-19 exposure [77]. Additionally, a UK study found that women had nine times greater likelihood of describing challenges accessing contraception after lockdown compared to before lockdown, and women conceiving after lockdown were more likely to have an unplanned pregnancy [78].

Some studies reported age, income, race, and gender identity differences in access to sexual health services. Access to sexual health services was lower among younger adults from 18 to 24

years old and unemployed women [77]. Similarly, a New Zealand study found that 22% of adolescents and young adults had unmet SRH needs during lockdown due to lack of information about service availability (41%) or COVID-19-related concerns (26%) [79]. A UK study found dramatic reductions in face-to-face sexual health service attendance for ages 13 and below (100% reduction), 14–15 (52% reduction), and 16–17 years old (31% reduction), suggesting that in-person services were a barrier to access during the pandemic especially for younger patients [80]. A Canadian study on university students found that cisgender women were two times more likely to report decreased access to STI testing/treatment and reproductive health services compared to cisgender men [81]. Other Canadian studies reported that Indigenous people identified greater difficulty accessing contraception than non-Indigenous Canadians [71] and decreased use of condoms among Two-Spirit, gay, bisexual and queer (2SGBQ+) men due to COVID-19 [82]. One study in Australia briefly reported that virtual care enabled could remove barriers to seeking out specialists for gender-affirming care [62].

### HIV care

Ten studies discussed the impact of the COVID-19 pandemic on people living with HIV. An Australia study reported the distribution of at-home HIV testing, although some patients were not enthusiastic about its use [62]. A Canadian study with participants who identified as 2SGBQ+ men, reported a 28% reduction in access to HIV testing due to COVID-19, particularly among individuals residing in more remote, country locations [82].

Three studies reported minimal changes in HIV medication management due to COVID-19 [83–85]. For example, an Australian study found that most participants had continuous access to their HIV-care provider, antiretroviral therapy, and monitoring tests [85]. Any barriers were due to transportation issues from lockdown measures, care provider cancellations, and social isolation [85].

Studies in Australia, Italy, Spain, and Belgium reported that there were no significant negative impacts of COVID-19 on virologic suppression [83, 84, 86], with one study finding a decreased number of patients experiencing virologic failure compared to before the pandemic [87]. This is despite finding decreased clinic visits, new consultations, laboratory tests, and timeliness of testing during the pandemic [74, 83, 84, 87]. In addition, a Canadian study found that cisgender women were 1.73 times more likely to report decreased access to HIV testing and treatment compared to cisgender men and students of colour were 1.54 times more likely to report decreased access to HIV services compared to white students [81].

To help reduce barriers to HIV medication management, Australian studies reported an increased proportion of HIV antiretroviral therapy sent to patients through home delivery [74, 84, 86], increased phone consultations and prescription sizes [74], and extended duration between appointments [62]. Virtual HIV care enabled some to access HIV specialist services despite living in remote areas [62]. Another study found a significant reduction in the mean weekly prescriptions of preexposure prophylaxis one week after restrictions were implemented, possibly due to reduced sexual behaviour or fewer visits to healthcare providers [88].

## Discussion

### Main findings

This systematic review synthesised 82 studies on the impact of COVID-19 on access and delivery of SRH services in high-income OECD countries with comparable economies and UHC systems. In this context, research on SRH is concentrated in relatively few countries: namely the UK, Australia, Italy, and Canada, and the changes made in other countries remains limited. Overall, considering the number of countries and breadth of SRH services included, there is a

paucity of research studying the impact of COVID-19 on access to or delivery of SRH in UHC countries. Despite this, common themes were noted between countries and services that may be generalizable to these settings.

During the pandemic, many SRH services decreased capacity or ceased service provision altogether. As a result, many patients reported difficulty accessing care across SRH services while others avoided care to prevent COVID-19 exposure, both of which impact the provision of necessary care. Changes in response to the pandemic were heterogeneous across countries and services; in fact, there seems to be great variation even between institutions within countries. Multiple factors may have contributed to this variation: uncertainty with appropriate changes necessary to decrease COVID-19 transmission early in the pandemic, variations in geographical contexts, and differences in policy. In some studies, differences in practice were due to incomplete communication of policy decisions, with some healthcare providers not being aware of changes in guidance [26, 41]. Due to heterogeneity in study design and outcome measures, timelines, and healthcare system structure, it is challenging to directly compare countries. Rather, we draw on relevant general patterns and themes across the SRH spectrum.

Across outpatient services, providers favoured models of care that prevented patients from attending clinics, including virtual or telephone appointments, home monitoring or testing (e.g. blood pressure in antepartum care), sending prescriptions via postage, and increasing prescription sizes. Hospitals favoured models of care that reduced time and number of people in hospital and aerosol-generating environments. These included home IOL, postponing elective surgeries for those with COVID-19, decreasing the number of support people present during labour and postpartum, favouring neuraxial anaesthesia over general anaesthesia, and shifting care to outpatient or virtual clinics when possible (e.g. medical management of abortions and ectopic pregnancies). Some patients preferred to avoid healthcare institutions, favouring home births, for example, which often had fewer caregiver restrictions and exposures in hospitals. Altogether, this often resulted in decreased healthcare utilisation, delays in testing and treatment, and new gaps in SRH access. The relative implementation of these changes varied greatly by institution and country. For example, the UK Health Security Agency (UKHSA) reported lower numbers of consultations, sexual health screenings, and STI diagnoses in 2020 and 2021 as compared to previous years [89]. However, there were also local and regional differences in chlamydia detection due to testing coverage, variation in settings that offered testing, and variations in COVID-19 disruptions [89]. Similarly in Canada, The Public Health Agency of Canada reported decreases in STBBI prevention, testing, and treatment services, as well as decrease in staffing during the first year of the pandemic [90].

These changes are also not unique to SRH. For example, Moynihan et al. (2021) [91] showed decreased overall healthcare utilisation by one third across 20 countries. Studies have reported delays and disruptions in the provision of cancer services and cancer surgery due to the pandemic [92, 93]. The long-term impact of COVID-19 on decreased access to SRH is not yet fully understood. Despite delays in testing and decreased access to care, studies in Italy, Belgium, and Australia mentioned viral suppression for patients with HIV were not affected [83, 84, 87]. Rimmer et al. described reduced oncology operating capacity as alarming with potentially increased morbidity in the long-term. For other services, long-term outcomes were not available [30]. However, a systematic review and meta-analysis by Chmielewska et al. reported increased mortality among pregnant women, stillbirth, ruptured ectopic pregnancies, and peripartum depression during the COVID-19 pandemic across 17 countries [94]. To better understand the impacts of these changes and influences on future policy, additional research on the long-term impacts of the pandemic on SRH is necessary.

This review found a limited number of studies that report on the impact of COVID-19 on SRH among underserved populations, such as sexual and gender minorities, people of low socioeconomic status, rural communities, racial/ethnic minorities, and people living with disabilities. Given the exacerbation of inequities created by the pandemic and reduced access to certain services, further research should focus on these populations to determine whether COVID-19-related adaptations and innovations have equitable impacts, especially as it relates to these populations.

### Limitations

This study has limitations. While this review was restricted to high-income countries with UHC, there were many underrepresented countries, and the results of this review may not generalise even within this subset. Many smaller changes across institutions may not have been reported in the published literature, instead being implemented and understood through institutional policies (e.g. increased use of PPE). Finally, most studies included were of lower levels of evidence, being observational in nature. To improve the robustness of this review, only studies with a quantitative or qualitative comparator to a previous time period or prior experience were included to better isolate the impact of the pandemic.

### Conclusion

In conclusion, the COVID-19 pandemic has had significant and heterogeneous impacts on a wide range of SRH services across high-income OECD countries with UHC, typically resulting in decreased access to and delivery of care. Studies were concentrated in relatively few countries. The long-term impacts of these changes and the impact of these changes on underserved populations remains uncharacterized and future research is required in these areas, especially in countries with less current information available. In addition, future studies should examine the impact of sustained service changes that were initially made during COVID-19 that could have benefits beyond the pandemic.

### Supporting information

**S1 Checklist. PRISMA 2009 checklist.**  
(DOCX)

**S1 Fig. PRISMA diagram.**  
(TIF)

**S1 Table. List of universal health care countries included in review.**  
(TIF)

**S2 Table. Quality assessment.**  
(DOCX)

### Author Contributions

**Conceptualization:** Michelle W. Tam, Victoria H. Davis, Monish Ahluwalia, Rachel S. Lee, Lori E. Ross.

**Data curation:** Michelle W. Tam, Victoria H. Davis, Monish Ahluwalia, Rachel S. Lee.

**Formal analysis:** Michelle W. Tam, Victoria H. Davis, Monish Ahluwalia.

**Investigation:** Michelle W. Tam, Victoria H. Davis, Monish Ahluwalia, Rachel S. Lee.

**Methodology:** Michelle W. Tam, Victoria H. Davis, Monish Ahluwalia, Rachel S. Lee, Lori E. Ross.

**Project administration:** Michelle W. Tam.

**Validation:** Michelle W. Tam, Victoria H. Davis, Monish Ahluwalia.

**Writing – original draft:** Michelle W. Tam, Victoria H. Davis, Monish Ahluwalia.

**Writing – review & editing:** Rachel S. Lee, Lori E. Ross.

## References

1. Hall KS, Samari G, Garbers S, Casey SE, Diallo DD, Orcutt M, et al. Centring sexual and reproductive health and justice in the global COVID-19 response. *The Lancet*. 2020; 395(10231):1175–7. [https://doi.org/10.1016/S0140-6736\(20\)30801-1](https://doi.org/10.1016/S0140-6736(20)30801-1) PMID: 32278371
2. Romanis EC, Parsons JA, Hodson N. COVID-19 and reproductive justice in Great Britain and the United States: ensuring access to abortion care during a global pandemic. *Journal of Law and the Biosciences*. 2020; 7(1):lsaa027. <https://doi.org/10.1093/jlb/lsaa027> PMID: 32728469
3. United Nations Committee on Economic, Social and Cultural Rights. General comment. No. 14. The right to the highest attainable standard of health (article 12 of the International Covenant on Economic, Social and Cultural Rights). E/C.12/2000/4. 2000.
4. Glasier A, Gülmezoglu AM, Schmid GP, Moreno CG, Van Look PF. Sexual and reproductive health: a matter of life and death. *The Lancet*. 2006; 368(9547):1595–607. [https://doi.org/10.1016/S0140-6736\(06\)69478-6](https://doi.org/10.1016/S0140-6736(06)69478-6) PMID: 17084760
5. Organization WH. Overview of public health and social measures in the context of COVID-19: interim guidance, 18 May 2020. World Health Organization; 2020.
6. Barrett A. Covid-19: Australia's future policies will be evidence led after "profound impact" of lifting restrictions, says minister. *British Medical Journal Publishing Group*; 2023.
7. Waters A. Covid-19: Show us evidence for lifting restrictions, doctors tell Johnson. *British Medical Journal Publishing Group*; 2022. <https://doi.org/10.1136/bmj.o383> PMID: 35168994
8. Moher D, Liberati A, Tetzlaff J, Altman DG, Group\* P. Preferred reporting items for systematic reviews and meta-analyses: the PRISMA statement. *Annals of internal medicine*. 2009; 151(4):264–9.
9. Barua B, Moir M. Comparing Performance of Universal Health Care Countries, 2020: Fraser Institute.; 2020.
10. Harrison R, Jones B, Gardner P, Lawton R. Quality assessment with diverse studies (QuADS): an appraisal tool for methodological and reporting quality in systematic reviews of mixed-or multi-method studies. *BMC Health Services Research*. 2021; 21(1):1–20.
11. Dorizzi C, Scotton F, Merlin F, Guidetti G, Marcon E, Montemurro D, et al. Rebirth in a COVID hospital: a point of view. *Minerva obstetrics and gynecology*. 2021; 73(2):261–7. <https://doi.org/10.23736/S2724-606X.20.04701-2> PMID: 33435661
12. Cena L, Rota M, Calza S, Massardi B, Trainini A, Stefana A. Estimating the Impact of the COVID-19 Pandemic on Maternal and Perinatal Health Care Services in Italy: Results of a Self-Administered Survey. *Frontiers in public health*. 2021; 9(101616579):701638.
13. Corrao G, Cantarutti A, Monzio Compagnoni M, Franchi M, Rea F. Change in healthcare during Covid-19 pandemic was assessed through observational designs. *Journal of clinical epidemiology*. 2022; 142 (jce, 8801383):45–53. <https://doi.org/10.1016/j.jclinepi.2021.10.015> PMID: 34715313
14. Boso Perez R, Reid D, Maxwell KJ, Gibbs J, Dema E, Bonell C, et al. Access to and quality of sexual and reproductive health services in Britain during the early stages of the COVID-19 pandemic: a qualitative interview study of patient experiences. *BMJ sexual & reproductive health*. 2022(101715577). <https://doi.org/10.1136/bmj.srh-2021-201413> PMID: 35444001
15. Silverio SA, De Backer K, Easter A, von Dadelszen P, Magee LA, Sandall J. Women's experiences of maternity service reconfiguration during the COVID-19 pandemic: A qualitative investigation. *Midwifery*. 2021; 102(8510930, mwf):103116. <https://doi.org/10.1016/j.midw.2021.103116> PMID: 34399382
16. Sarre G, Hyer S, Chauhan-Whittingham P, Johnson A. Patients' experience of antenatal diabetic care during the current COVID-19 pandemic: an exploratory study. *Practical Diabetes*. 2021; 38(6):23–30.
17. John JR, Curry G, Cunningham-Burley S. Exploring ethnic minority women's experiences of maternity care during the SARS-CoV-2 pandemic: A qualitative study. *BMJ Open*. 2021; 11(9):e050666. <https://doi.org/10.1136/bmjopen-2021-050666> PMID: 34489290

18. Montgomery E, De Backer K, Easter A, Magee LA, Sandall J, Silverio SA. Navigating uncertainty alone: A grounded theory analysis of women's psycho-social experiences of pregnancy and childbirth during the COVID-19 pandemic in London. *Women and Birth*. 2023; 36(1):e106–e17. <https://doi.org/10.1016/j.wombi.2022.05.002> PMID: 35610170
19. Khoury JE, Atkinson L, Bennett T, Jack SM, Gonzalez A. Prenatal distress, access to services, and birth outcomes during the COVID-19 pandemic: Findings from a longitudinal study. *Early Human Development*. 2022; 170:105606. <https://doi.org/10.1016/j.earlhumdev.2022.105606> PMID: 35728399
20. Baravelli CM, Macsali F, Telle K, Kinge JM, Oakley L, Magnus MC, et al. Impact of COVID-19 on pregnancy-related healthcare utilisation: a prospective nationwide registry study. *BMJ open*. 2022; 12(10):e064118. <https://doi.org/10.1136/bmjopen-2022-064118> PMID: 36253044
21. Overbeck G, Graungaard AH, Rasmussen IS, Andersen JH, Ertmann RK, Kragstrup J, et al. Pregnant women's concerns and antenatal care during COVID-19 lock-down of the Danish society. *Danish medical journal*. 2020; 67(12). PMID: 33269695
22. Jardine J, Relph S, Magee LA, von Dadelszen P, Morris E, Ross-Davie M, et al. Maternity services in the UK during the coronavirus disease 2019 pandemic: a national survey of modifications to standard care. *BJOG: an international journal of obstetrics and gynaecology*. 2021; 128(5):880–9. <https://doi.org/10.1111/1471-0528.16547> PMID: 32992408
23. Doncarli A, Araujo-Chaveron L, Crenn-Hebert C, Demiguel V, Boudet-Berquier J, Barry Y, et al. Impact of the SARS-CoV-2 pandemic and first lockdown on pregnancy monitoring in France: the COVIMATER cross-sectional study. *BMC pregnancy and childbirth*. 2021; 21(1):799. <https://doi.org/10.1186/s12884-021-04256-9> PMID: 34847872
24. Justman N, Shahak G, Gutzeit O, Ben Zvi D, Ginsberg Y, Solt I, et al. Lockdown with a Price: The impact of the COVID-19 Pandemic on Prenatal Care and Perinatal Outcomes in a Tertiary Care Center. *The Israel Medical Association journal: IMAJ*. 2020; 22(9):533–7. PMID: 33236549
25. Trinh LTT, Achat H, Chua S, Gidaszewski B, Stubbs JM, Guevarra V. Effects of the COVID-19 Pandemic on the Use of Telehealth for Antenatal Care. *Telemedicine journal and e-health: the official journal of the American Telemedicine Association*. 2022(dyh, 100959949). <https://doi.org/10.1089/tmj.2021.0631> PMID: 35417264
26. Bradfield Z, Hauck Y, Homer CSE, Sweet L, Wilson AN, Szabo RA, et al. Midwives' experiences of providing maternity care during the COVID-19 pandemic in Australia. *Women and birth: journal of the Australian College of Midwives*. 2022; 35(3):262–71. <https://doi.org/10.1016/j.wombi.2021.02.007> PMID: 33752996
27. Potenza S, Marzan MB, Rolnik DL, Palmer K, Said J, Whitehead C, et al. Business as usual during the COVID-19 pandemic? Reflections on state-wide trends in maternity telehealth consultations during lockdown in Victoria and New South Wales. *The Australian & New Zealand journal of obstetrics & gynaecology*. 2021; 61(6):982–5. <https://doi.org/10.1111/ajo.13438> PMID: 34611888
28. Sweet L, Wilson AN, Bradfield Z, Hauck Y, Kuliukas L, Homer CSE, et al. Childbearing women's experiences of the maternity care system in Australia during the first wave of the COVID-19 pandemic. *Women & Birth*. 2022; 35(3):223–31. <https://doi.org/10.1016/j.wombi.2021.08.010> PMID: 34535423
29. Riley V, Ellis N, Mackay L, Taylor J. The impact of COVID-19 restrictions on women's pregnancy and postpartum experience in England: A qualitative exploration. *Midwifery*. 2021;101:N.PAG–N.PAG.
30. Rimmer MP, Al Wattar BH, Members U. Provision of obstetrics and gynaecology services during the COVID-19 pandemic: a survey of junior doctors in the UK National Health Service. *BJOG: an international journal of obstetrics and gynaecology*. 2020; 127(9):1123–8. <https://doi.org/10.1111/1471-0528.16313> PMID: 32460422
31. Dixon L, Jackson T, Tamati-Elliffe J, McAra-Couper J, Griffiths C, Miller S, et al. Birth under restrictions: Exploring women's experiences of maternity care in Aotearoa New Zealand during the COVID-19 lockdown of 2020. *New Zealand College of Midwives Journal*. 2023(59).
32. Cruz-Ramos MC, Resurrección DM, Hernández-Albújar Y. Childbirth experience during the COVID-19 pandemic: A qualitative thematic analysis. *Midwifery*. 2023; 121:103669. <https://doi.org/10.1016/j.midw.2023.103669> PMID: 37001431
33. Gamberini C, Angeli F, Knight L, Zaami M, Al-Nasiry S, Ambrosino E. Effect of COVID-19 on antenatal care: experiences of medical professionals in the Netherlands. *Reproductive Health*. 2023; 20(1):1–16. <https://doi.org/10.1186/s12978-023-01587-y> PMID: 36890561
34. Hertle D, Wende D, Schumacher L, Bauer NH. Midwives' and women's views on digital midwifery care in Germany: results from an online survey. *Midwifery*. 2022; 115:103472. <https://doi.org/10.1016/j.midw.2022.103472> PMID: 36191383
35. Fletcher B, Chappell LC, Lavalley L, Wilson HM, Stevens R, Mackillop L, et al. Changes to management of hypertension in pregnancy, and attitudes to self-management: An online survey of obstetricians,



- before and following the first wave of the COVID-19 pandemic. *Pregnancy hypertension*. 2021; 26 (101552483):54–61.
36. Wilson AN, Sweet L, Vasilevski V, Hauck Y, Wynter K, Kuliukas L, et al. Australian women's experiences of receiving maternity care during the COVID-19 pandemic: A cross-sectional national survey. *Birth: Issues in Perinatal Care*. 2022; 49(1):30–9. <https://doi.org/10.1111/birt.12569> PMID: 34180087
  37. Nakagawa K, Umazume T, Mayama M, Chiba K, Saito Y, Noshiro K, et al. Survey of attitudes of individuals who underwent remote prenatal check-ups and consultations in response to the COVID-19 pandemic. *Journal of Obstetrics and Gynaecology Research*. 2021((Nakagawa, Umazume, Mayama, Chiba, Saito, Noshiro, Morikawa, Watari) Department of Obstetrics and Gynecology, Hokkaido University Graduate School of Medicine, Sapporo, Japan(Yoshino) Center for Intellectual Property and Innovation, Hokkaido University, Sa). <https://doi.org/10.1111/jog.14806> PMID: 33880830
  38. Kluwgant D, Homer C, Dahlen H. "Never let a good crisis go to waste": Positives from disrupted maternity care in Australia during COVID-19. *Midwifery*. 2022; 110(8510930, mwf):103340. <https://doi.org/10.1016/j.midw.2022.103340> PMID: 35504154
  39. Clark A, Jung E, Prusky C, Shah BR, Halperin IJ. An Evaluation of Virtual Care for Gestational Diabetes Using the Quadruple Aim Framework: Assessment of Patient and Provider Experience, Cost, and Clinical Outcomes. *Canadian Journal of Diabetes*. 2023; 47(3):236–42. e3. <https://doi.org/10.1016/j.cjcd.2022.12.002> PMID: 36707387
  40. Ceulemans M, Foulon V, Panchaud A, Winterfeld U, Pomar L, Lambelet V, et al. Vaccine willingness and impact of the covid-19 pandemic on women's perinatal experiences and practices-a multinational, cross-sectional study covering the first wave of the pandemic. *International Journal of Environmental Research and Public Health*. 2021; 18(7):3367. <https://doi.org/10.3390/ijerph18073367> PMID: 33805097
  41. Homer CSE, Davies-Tuck M, Dahlen HG, Scarf VL. The impact of planning for COVID-19 on private practising midwives in Australia. *Women and birth: journal of the Australian College of Midwives*. 2021; 34(1):e32–e7. <https://doi.org/10.1016/j.wombi.2020.09.013> PMID: 32994144
  42. Dell'Utri C, Manzoni E, Cipriani S, Spizzico C, Dell'Acqua A, Barbara G, et al. Effects of SARS Cov-2 epidemic on the obstetrical and gynecological emergency service accesses. What happened and what shall we expect now? *European Journal of Obstetrics and Gynecology and Reproductive Biology*. 2020; 254((Dell'Utri, Cipriani, Barbara, Kustermann) Gynecology Unit, Fondazione IRCCS Ca' Granda-Ospedale Maggiore Policlinico, Milan, Italy(Manzoni, Dell'Acqua, Parazzini) Department of Clinical Sciences and Community Health, Università Degli Studi, Milan, Italy):64–8.
  43. Boisvert C, Talarico R, Denize KM, Frank O, Murphy MS, Dingwall-Harvey AL, et al. Giving Birth in the Early Phases of the COVID-19 Pandemic: The Patient Experience. *Maternal and child health journal*. 2022; 26(9):1753–61. <https://doi.org/10.1007/s10995-022-03495-2> PMID: 35895161
  44. Zaigham M, Linden K, Sengpiel V, Mariani I, Valente EP, Covi B, et al. Large gaps in the quality of healthcare experienced by Swedish mothers during the COVID-19 pandemic: A cross-sectional study based on WHO standards. *Women and Birth*. 2022; 35(6):619–27. <https://doi.org/10.1016/j.wombi.2022.01.007> PMID: 35123922
  45. Harkness M, Yuill C, Cheyne H, Stock SJ, McCourt C, Consortia CS. Induction of labour during the COVID-19 pandemic: a national survey of impact on practice in the UK. *BMC pregnancy and childbirth*. 2021; 21(1):310. <https://doi.org/10.1186/s12884-021-03781-x> PMID: 33874913
  46. Munda A, Indihar BŠ, Okanovič G, Zorko K, Steblovnik L, Barlovič DP. Maternal and perinatal outcomes during the COVID-19 epidemic in pregnancies complicated by gestational diabetes. *Slovenian Journal of Public Health*. 2022; 62(1):22–9. <https://doi.org/10.2478/sjph-2023-0004> PMID: 36694793
  47. Haikin Herzberger E, Efros O, Herzberger S, Biron-Shental T, Shechter-Maor G. Differences in obstetric healthcare utilization and delivery complications before and after the COVID-19 pandemic—a retrospective study. *The Journal of Maternal-Fetal & Neonatal Medicine*. 2022; 35(25):7194–9.
  48. Komatsu H, Banno K, Yanaihara N, Kimura T, Board Members of Japan Society of O, Gynecology. Prevention and practice during the COVID-19 emergency declaration period in Japanese obstetrical/gynecological facilities. *The journal of obstetrics and gynaecology research*. 2020; 46(11):2237–41.
  49. Gonzalez-Timoneda A, Hernandez Hernandez V, Pardo Moya S, Alfaro Blazquez R. Experiences and attitudes of midwives during the birth of a pregnant woman with COVID-19 infection: A qualitative study. *Women and birth: journal of the Australian College of Midwives*. 2021; 34(5):465–72. <https://doi.org/10.1016/j.wombi.2020.12.001> PMID: 33358355
  50. Binyamin Y, Heesen P, Gruzman I, Zlotnik A, Ioscovich A, Ronen A, et al. A Retrospective Investigation of Neuraxial Anesthesia Rates for Elective Cesarean Delivery Before and During the SARS-CoV-2 Pandemic. *The Israel Medical Association journal: IMAJ*. 2021; 23(7):408–11. PMID: 34251121

51. Aydin E, Glasgow KA, Weiss SM, Khan Z, Austin T, Johnson MH, et al. Giving birth in a pandemic: women's birth experiences in England during COVID-19. *BMC Pregnancy and Childbirth*. 2022; 22(1):304. <https://doi.org/10.1186/s12884-022-04637-8> PMID: 35399066
52. Moltrecht B, de Cassan S, Rapa E, Hanna JR, Law C, Dalton LJ. Challenges and opportunities for perinatal health services in the COVID-19 pandemic: a qualitative study with perinatal healthcare professionals. *BMC Health Services Research*. 2022; 22(1):1–11.
53. Stirling Cameron E, Ramos H, Aston M, Kuri M, Jackson L. "COVID affected us all:" the birth and postnatal health experiences of resettled Syrian refugee women during COVID-19 in Canada. *Reproductive Health*. 2021; 18(1):1–11.
54. Bayrampour H, Tsui MYE. Postpartum people's experiences of and responses to the COVID-19 pandemic during the first year of the pandemic: A descriptive qualitative study. *Women's Health*. 2023; 19:17455057231157480. <https://doi.org/10.1177/17455057231157480> PMID: 36846969
55. Brandell K, Vanbenschoten H, Parachini M, Gomperts R, Gemzell-Danielsson K. Telemedicine as an alternative way to access abortion in Italy and characteristics of requests during the COVID-19 pandemic. *BMJ sexual & reproductive health*. 2021(101715577). <https://doi.org/10.1136/bmjshr-2021-201281> PMID: 34697044
56. De Kort L, Wouters E, Van de Velde S. Obstacles and opportunities: a qualitative study of the experiences of abortion centre staff with abortion care during the first COVID-19 lockdown in Flanders, Belgium. *Sexual and reproductive health matters*. 2021; 29(1):1921901. <https://doi.org/10.1080/26410397.2021.1921901> PMID: 33982638
57. Ennis M, Wahl K, Jeong D, Knight K, Renner R, Munro S, et al. The perspective of Canadian health care professionals on abortion service during the COVID-19 pandemic. *Family practice*. 2021; 38(Suppl 1):i30–i6. <https://doi.org/10.1093/fampra/cmab083> PMID: 34448482
58. Hukku S, Menard A, Kemzang J, Hastings E, Foster AM. "I just was really scared, because it's already such an uncertain time": Exploring women's abortion experiences during the COVID-19 pandemic in Canada. *Contraception*. 2022; 110(dqn, 0234361):48–55. <https://doi.org/10.1016/j.contraception.2022.01.014> PMID: 35123980
59. Mallaury V, Steve N, Geneviève V, Olivier B, Florence B, Aubert A. Impact of the COVID-19 pandemic and the emergency measures on abortion care taken during this period in a French region (Provence Alpes Côte d'Azur). *Journal of Gynecology Obstetrics and Human Reproduction*. 2022; 51(10):102478.
60. Atay H, Perivier H, Gemzell-Danielsson K, Guilleminot J, Hassoun D, Hottois J, et al. Why women choose at-home abortion via teleconsultation in France: drivers of telemedicine abortion during and beyond the COVID-19 pandemic. *BMJ sexual & reproductive health*. 2021; 47(4):285–92.
61. Greene J, Butler E, Conlon C, Antosik-Parsons K, Gomperts R. Seeking online telemedicine abortion outside the jurisdiction from Ireland following implementation of telemedicine provision locally. *BMJ sexual & reproductive health*. 2021(101715577). <https://doi.org/10.1136/bmjshr-2021-201205> PMID: 34697043
62. Newman CE, Fraser D, Ong JJ, Bourne C, Grulich AE, Bavinton BR. Sustaining sexual and reproductive health through COVID-19 pandemic restrictions: qualitative interviews with Australian clinicians. *Sexual Health*. 2022; 19(6):525–32. <https://doi.org/10.1071/SH22109> PMID: 36038359
63. Rød H, Gomperts R, Atay H, Tersbøl BP. "In some clinics, they said it's elective, and then they would refuse": A Mixed-Methods Study on the impact of the COVID-19 pandemic on access to abortion services in Germany. *Sexual & Reproductive Healthcare*. 2023; 36:100854.
64. Cui N, Gemzell-Danielsson K, Gomperts R. Why women choose self-managed telemedicine abortion in the Netherlands during the COVID-19 pandemic: a national mixed methods study. *BMJ Sexual & Reproductive Health*. 2023; 49(2):105–11. <https://doi.org/10.1136/bmjshr-2022-201591> PMID: 36410763
65. Lam JSG, Shere M, Motamedi N, Vilos GA, Abu-Rafea B, Vilos AG. Impact of the COVID-19 Pandemic on Access to Fertility Care: A Retrospective Study at a University-Affiliated Fertility Practice. *Journal of Obstetrics and Gynaecology Canada*. 2022; 44(4):378–82.
66. Schaler L, Glover LE, Wingfield M. Irish fertility patients' attitudes to pregnancy and risk mitigation strategies during the COVID-19 pandemic. *Human fertility (Cambridge, England)*. 2022(100888143):1–6. <https://doi.org/10.1080/14647273.2022.2045518> PMID: 35255765
67. Karavani G, Chill HH, Meirman C, Dior UP, Ben-Meir A. Communication with fertility patients during the COVID-19 pandemic- let's talk about it. *European journal of obstetrics, gynecology, and reproductive biology*. 2021; 260(e4l, 0375672):154–8.
68. Gomez D, Simpson AN, Sue-Chue-Lam C, de Mestral C, Dossa F, Nantais J, et al. A population-based analysis of the impact of the COVID-19 pandemic on common abdominal and gynecological emergency department visits. *CMAJ: Canadian Medical Association journal = journal de l'Association medicale canadienne*. 2021; 193(21):E753–E60. <https://doi.org/10.1503/cmaj.202821> PMID: 34035055

69. Lowe-Zinola J, Williamson M, Gaunt E, Boulter H, Pounds R, Kehoe S, et al. Evaluating the impact of the COVID-19 pandemic on tertiary gynaecological cancer care delivery: a population based study. *Journal of Obstetrics and Gynaecology*. 2022; 42(8):3692–700. <https://doi.org/10.1080/01443615.2022.2153296> PMID: 36469698
70. Bittleston H, Goller JL, Temple-Smith M, Hocking JS, Coombe J. 'I didn't want to visit a doctor unless it was extremely necessary': perspectives on delaying access to sexual and reproductive health care during the COVID-19 pandemic in Australia from an online survey. *Australian Journal of Primary Health*. 2022; 28(2):131–6.
71. Baaske A, Brotto LA, Galea LA, Albert AY, Smith L, Kaida A, et al. Barriers to Accessing contraception and cervical and breast cancer screening during COVID-19: A prospective cohort study. *Journal of Obstetrics and Gynaecology Canada*. 2022; 44(10):1076–83. <https://doi.org/10.1016/j.jogc.2022.05.011> PMID: 35738558
72. Leung E, Pervaiz Z, Lowe-Zinola J, Cree S, Kwong A, Marriott N, et al. Maintaining surgical care delivery during the COVID-19 pandemic: A comparative cohort study at a tertiary gynecological cancer centre. *Gynecologic oncology*. 2021; 160(3):649–54. <https://doi.org/10.1016/j.ygyno.2020.12.013> PMID: 33358197
73. Chow EPF, Hocking JS, Ong JJ, Phillips TR, Fairley CK. Sexually Transmitted Infection Diagnoses and Access to a Sexual Health Service before and after the National Lockdown for COVID-19 in Melbourne, Australia. *Open Forum Infectious Diseases*. 2021; 8(1):ofaa536. <https://doi.org/10.1093/ofid/ofaa536> PMID: 33506064
74. Phillips TR, Fairley CK, Donovan B, Ong JJ, McNulty A, Marshall L, et al. Sexual health service adaptations to the coronavirus disease 2019 (COVID-19) pandemic in Australia: a nationwide online survey. *Australian and New Zealand journal of public health*. 2021; 45(6):622–7. <https://doi.org/10.1111/1753-6405.13158> PMID: 34473388
75. Ryu H, Blaque E, Stewart M, Anand P, Gómez-Ramírez O, MacKinnon KR, et al. Disruptions of sexually transmitted and blood borne infections testing services during the COVID-19 pandemic: Accounts of service providers in Ontario, Canada. *BMC Health Services Research*. 2023; 23(1):1–12.
76. Lewis R, Blake C, Shimonovich M, Coia N, Duffy J, Kerr Y, et al. Disrupted prevention: Condom and contraception access and use among young adults during the initial months of the COVID-19 pandemic. An online survey. *BMJ Sexual and Reproductive Health*. 2021((Lewis, Blake, Shimonovich, Mitchell) MRC/CSO Social and Public Health Sciences Unit (SPHSU), University of Glasgow, Glasgow, United Kingdom(Coia, Wilson) Sandyford Sexual Health Service, NHS Greater Glasgow and Clyde, Glasgow, United Kingdom(Duffy) Healt). <https://doi.org/10.1136/bmjshr-2020-200975> PMID: 33707178
77. Coombe J, Kong F, Bittleston H, Williams H, Tomnay J, Vaisey A, et al. Contraceptive use and pregnancy plans among women of reproductive age during the first Australian COVID-19 lockdown: findings from an online survey. *The European journal of contraception & reproductive health care: the official journal of the European Society of Contraception*. 2021; 26(4):265–71. <https://doi.org/10.1080/13625187.2021.1884221> PMID: 33615946
78. Balachandren N, Barrett G, Stephenson JM, Yasmin E, Mavrelou D, Davies M, et al. Impact of the SARS-CoV-2 pandemic on access to contraception and pregnancy intentions: a national prospective cohort study of the UK population. *BMJ sexual & reproductive health*. 2022; 48(1):60–5. <https://doi.org/10.1136/bmjshr-2021-201164> PMID: 34675063
79. Rose SB, Garrett SM, McKinlay EM, Morgan SJ. Access to sexual healthcare during New Zealand's COVID-19 lockdown: cross-sectional online survey of 15-24-year-olds in a high deprivation region. *BMJ sexual & reproductive health*. 2021(101715577).
80. Bekaert S, Azzopardi L. Safeguarding teenagers in a sexual health service during the COVID-19 pandemic. *Sexually Transmitted Infections*. 2022; 98(3):219–21. <https://doi.org/10.1136/sextrans-2021-055055> PMID: 34226202
81. Wood J, Quinn-Nilas C, McKay A, Wentland J. Perceived impact of COVID-19 on sexual health and access to sexual health services among university students in Canada. *Canadian Journal of Human Sexuality*. 2022; 31(1):79–90.
82. Souleymanov R, Amjad S, McLeod A, Payne M, Ringaert L, Larcombe L, et al. Impact of the COVID-19 pandemic on access to HIV testing and condom use among two-spirit, gay, bisexual, and queer (2SGBQ+) men in Manitoba. *AIDS care*. 2023:1–8. <https://doi.org/10.1080/09540121.2023.2208324> PMID: 37182219
83. Giacomelli A, Bonazzetti C, Conti F, Pezzati L, Oreni L, Micheli V, et al. Brief Report: Impact of the COVID-19 Pandemic on Virological Suppression in People Living With HIV Attending a Large Italian HIV Clinic. *Journal of acquired immune deficiency syndromes (1999)*. 2021; 88(3):299–304. <https://doi.org/10.1097/QAI.0000000000002754> PMID: 34651605
84. Lee D, Chow EPF, Aguirre I, Fairley CK, Ong JJ. Access to hiv antiretroviral therapy among people living with hiv in melbourne during the covid-19 pandemic. *International Journal of Environmental*

- Research and Public Health. 2021; 18(23):12765. <https://doi.org/10.3390/ijerph182312765> PMID: 34886496
85. Weerasuria M, Ko C, Ehm A, O'Bryan J, McMahon J, Woolley I, et al. The Impact of the COVID-19 Pandemic on People Living with HIV in Victoria, Australia. *AIDS research and human retroviruses*. 2021; 37(4):322–8. <https://doi.org/10.1089/AID.2021.0007> PMID: 33586997
  86. Quirós-González V, Rubio R, Pulido F, Rial-Crestelo D, Martín-Jurado C, Hernández-Ros MÁ, et al. Healthcare outcomes in patients with HIV infection at a tertiary hospital during the COVID-19 pandemic. *Enfermedades infecciosas y microbiología clínica (English ed)*. 2023; 41(3):149–54. <https://doi.org/10.1016/j.eimce.2021.07.011> PMID: 36870732
  87. El Moussaoui M, Lambert N, Maes N, Fombellida K, Vaira D, Moutschen M, et al. Impact of the COVID-19 pandemic situation on HIV care in Liege, Belgium. *HIV Research and Clinical Practice*. 2021; 22(3):63–70.
  88. Traeger MW, Patel P, Guy R, Hellard ME, Stooze MA, Australian Collaboration for Coordinated Enhanced Sentinel S. Changes in HIV preexposure prophylaxis prescribing in Australian clinical services following COVID-19 restrictions. *AIDS (London, England)*. 2021; 35(1):155–7.
  89. (UKHSA) UKHSA. Official Statistics Sexually transmitted infections and screening for chlamydia in England: 2022 report.
  90. Canada PHAo. National Report: Findings from the Survey on the Impact of COVID-19 on the delivery of STBBI prevention, testing and treatment, including harm reduction services, in Canada. Ottawa, Canada; 2021.
  91. Moynihan R, Sanders S, Michaleff ZA, Scott AM, Clark J, To EJ, et al. Impact of COVID-19 pandemic on utilisation of healthcare services: a systematic review. *BMJ Open*. 2021; 11(3):e045343. <https://doi.org/10.1136/bmjopen-2020-045343> PMID: 33727273
  92. Riera R, Bagattini ÁM, Pacheco RL, Pachito DV, Roitberg F, Ilbawi A. Delays and disruptions in cancer health care due to COVID-19 pandemic: systematic review. *JCO global oncology*. 2021; 7(1):311–23.
  93. Sud A, Jones ME, Broggio J, Loveday C, Torr B, Garrett A, et al. Collateral damage: the impact on outcomes from cancer surgery of the COVID-19 pandemic. *Annals of Oncology*. 2020; 31(8):1065–74. <https://doi.org/10.1016/j.annonc.2020.05.009> PMID: 32442581
  94. Chmielewska B, Barratt I, Townsend R, Kalafat E, van der Meulen J, Gurol-Urganci I, et al. Effects of the COVID-19 pandemic on maternal and perinatal outcomes: a systematic review and meta-analysis. *The Lancet Global Health*. 2021; 9(6):e759–e72. [https://doi.org/10.1016/S2214-109X\(21\)00079-6](https://doi.org/10.1016/S2214-109X(21)00079-6) PMID: 33811827
  95. Henry A, Yang J, Grattan S, Roberts L, Lainchbury A, Shanthosh J, et al. Effects of the COVID-19 pandemic and telehealth on antenatal screening and services, including for mental health and domestic violence: an Australian mixed-methods study. *Frontiers in global women's health*. 2022; 3:819953. <https://doi.org/10.3389/fgwh.2022.819953> PMID: 35814835
  96. Suárez-Cortés M, Castaño-Molina MD, Ramos-Morcillo AJ, Molina-Rodríguez A, Jiménez-Ruiz I, Hernández-López MJ, Harillo-Acevedo FD, Carrillo-García C. Impact of COVID-19 Restrictions in Childbirth and Puerperium: A Cross-Sectional Study. *InHealthcare*. 2023; 11(2):249 <https://doi.org/10.3390/healthcare11020249> PMID: 36673617
  97. Ma R, Foley K, Saxena S. Access to and use of contraceptive care during the first COVID-19 lockdown in the UK: a web-based survey. *BJGP Open*. 2022; 6(3): BJGPO.2021.0218 <https://doi.org/10.3399/BJGPO.2021.0218> PMID: 35487583
